# Supplementary material for: The polypill in the primary prevention of cardiovascular disease: cost-effectiveness in the Dutch population
Source: PubMed Central journal article supplement — BMJ Open. 2011 Dec 21;1(2):e000363. doi: 10.1136/bmjopen-2011-000363 (PMC3278482; doi:10.1136/bmjopen-2011-000363), 2011-12-21

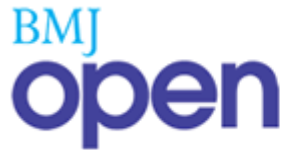

**The polypill in the primary prevention of cardiovascular disease: cost-effectiveness in the Dutch population.**

|                                 |                                                                                                                                                                                                                                                                                                                                                                                                                                                                                                                                                                                                                                                                                                                                                               |
|---------------------------------|---------------------------------------------------------------------------------------------------------------------------------------------------------------------------------------------------------------------------------------------------------------------------------------------------------------------------------------------------------------------------------------------------------------------------------------------------------------------------------------------------------------------------------------------------------------------------------------------------------------------------------------------------------------------------------------------------------------------------------------------------------------|
| Journal:                        | <i>BMJ Open</i>                                                                                                                                                                                                                                                                                                                                                                                                                                                                                                                                                                                                                                                                                                                                               |
| Manuscript ID:                  | bmjopen-2011-000363                                                                                                                                                                                                                                                                                                                                                                                                                                                                                                                                                                                                                                                                                                                                           |
| Article Type:                   | Research                                                                                                                                                                                                                                                                                                                                                                                                                                                                                                                                                                                                                                                                                                                                                      |
| Date Submitted by the Author:   | 14-Sep-2011                                                                                                                                                                                                                                                                                                                                                                                                                                                                                                                                                                                                                                                                                                                                                   |
| Complete List of Authors:       | van Gils, Paul; National Institute for Public Health and the Environment, Centre for Prevention and Health Services Research Over, Eelco; National Institute for Public Health and the Environment, Centre for Prevention and Health Services Research Hamberg, Heleen; National Institute for Public Health and the Environment, Centre for Public Health Forecasting de Wit, G. Ardine; National Institute for Public Health and the Environment, Centre for Prevention and Health Services Research van den Berg, Matthijs; National Institute for Public Health and the Environment, Centre for Public Health Forecasting Engelfriet, Peter; National Institute for Public Health and the Environment, Centre for Prevention and Health Services Research |
| <b>Primary Subject Heading</b>: | Cardiovascular medicine                                                                                                                                                                                                                                                                                                                                                                                                                                                                                                                                                                                                                                                                                                                                       |
| Keywords:                       | Myocardial infarction < CARDIOLOGY, HEALTH ECONOMICS, PUBLIC HEALTH, Stroke < NEUROLOGY                                                                                                                                                                                                                                                                                                                                                                                                                                                                                                                                                                                                                                                                       |
|                                 |                                                                                                                                                                                                                                                                                                                                                                                                                                                                                                                                                                                                                                                                                                                                                               |

SCHOLARONE™  
Manuscripts

1  
2  
3  
4  
5  
6  
7  
8  
9  
10  
11  
12  
13  
14  
15  
16  
17  
18  
19  
20  
21  
22  
23  
24  
25  
26  
27  
28  
29  
30  
31  
32  
33  
34  
35  
36  
37  
38  
39  
40  
41  
42  
43  
44  
45  
46  
47  
48  
49  
50  
51  
52  
53  
54  
55  
56  
57  
58  
59  
60

**The polypill in the primary prevention of cardiovascular disease: cost-effectiveness in the Dutch population.**

*Paul F. van Gils<sup>1</sup>, Eelco A.B. Over<sup>1</sup>, Heleen H. Hamberg-van Reenen<sup>2</sup>, G. Ardine de Wit<sup>1</sup>, Matthijs van den Berg<sup>2</sup>, Albertine J. Schuit<sup>1</sup> en Peter M. Engelfriet<sup>1</sup>*

<sup>1</sup>National Institute for Public Health and the Environment, Centre for Prevention and Health Services Research, Bilthoven, The Netherlands

<sup>2</sup>National Institute for Public Health and the Environment, Centre for Public Health Forecasting, Bilthoven, the Netherlands

Paul van Gils, MSc  
Centre for Prevention and Health Services Research  
National Institute of Public Health and the Environment  
PO Box 1  
3723 BA Bilthoven  
The Netherlands  
Telephone: +31 302748581  
Fax: + 31 30 274 4407  
Email: [paul.van.gils@rivm.nl](mailto:paul.van.gils@rivm.nl)

Eelco A.B. Over, PhD  
Centre for Prevention and Health Services Research  
National Institute of Public Health and the Environment  
PO Box 1  
3723 BA Bilthoven  
The Netherlands  
Telephone: +31 302742700  
Fax: + 31 30 274 4407  
Email: [eelco.over@rivm.nl](mailto:eelco.over@rivm.nl)

Heleen H. Hamberg, PhD  
Centre for Public Health Forecasting  
National Institute for Public Health and the Environment  
P.O. box 1  
3720 BA Bilthoven  
The Netherlands  
Telephone: +31 30 2742735  
Fax: +31 30 2744450  
Email: [heleen.hamberg@rivm.nl](mailto:heleen.hamberg@rivm.nl)

G.Ardine de Wit, PhD  
Centre for Prevention and Health Services Research  
National Institute of Public Health and the Environment  
PO Box 1  
3720 BA Bilthoven  
The Netherlands  
Telephone: + 31 30 274 3206  
Fax: + 31 30 274 4407  
Email: [ardine.de.wit@rivm.nl](mailto:ardine.de.wit@rivm.nl)

1  
2  
3  
4 M. van den Berg, PhD  
5 Centre for Public Health Forecasting  
6 National Institute for Public Health and the Environment  
7 P.O. box 1  
8 3720 BA Bilthoven  
9 The Netherlands  
10 Telephone: +31 30 2743349  
11 Fax: +31 30 2744450  
12 Email: [matthijs.van.den.berg@rivm.nl](mailto:matthijs.van.den.berg@rivm.nl)  
13  
14

15 Albertine J. Schuit, PhD  
16 Centre for Prevention and Health Services Research  
17 National Institute of Public Health and the Environment  
18 PO Box 1  
19 3720 BA Bilthoven  
20 The Netherlands  
21 Telephone: + 31 30 274 2945  
22 Fax: + 31 30 274 4407  
23 Email: [janinte.schuit@rivm.nl](mailto:janinte.schuit@rivm.nl)  
24  
25

26 Peter M. Engelfriet, MD, PhD  
27 Centre for Prevention and Health Services Research  
28 National Institute of Public Health and the Environment  
29 PO Box 1  
30 3720 BA Bilthoven  
31 The Netherlands  
32 Telephone: + 31 30 274 4388  
33 Fax: + 31 30 274 4407  
34 Email: [peter.engelfriet@rivm.nl](mailto:peter.engelfriet@rivm.nl)  
35  
36

37 Correspondence: Paul van Gils  
38 Centre for Prevention and Health Services Research (pb 101)  
39 National Institute of Public Health and the Environment  
40 PO Box 1  
41 3720 BA Bilthoven  
42 The Netherlands  
43  
44 [Paul.van.gils@rivm.nl](mailto:Paul.van.gils@rivm.nl)  
45 Phone: + 31 30 2748581  
46 Fax: + 31 30 274 4407  
47  
48  
49

#### 50 **Conflict of interest statement**

51 We declare that no conflict of interest exists for any of the authors.  
52

53 The Corresponding Author has the right to grant on behalf of all authors and does grant on  
54 behalf of all authors, an exclusive licence (or non exclusive for government employees) on a  
55 worldwide basis to the BMJ Publishing Group Ltd and its Licensees to permit this article (if  
56 accepted) to be published in BMJ editions and any other BMJ PGL products and sublicences  
57 to exploit all subsidiary rights, as set out in our licence  
58  
59  
60

## ABSTRACT

### Objective

The aim of the present study was to estimate the cost-effectiveness of the polypill in the primary prevention of cardiovascular disease.

### Design

A health economic modeling study.

### Setting

Primary health care in the Netherlands.

### Intervention

Opportunistic screening followed by prescription of the polypill to eligible individuals. Eligibility was defined as having a minimum 10-year risk of cardiovascular death as assessed with the SCORE function of alternatively 5%, 7.5%, or 10%. Different versions of the polypill were considered, depending on composition: 1) the Indian polycap, with three different types of blood pressure lowering drugs, a statin, and aspirin; 2) as 1) but without aspirin; 3) as 2) but with a double statin dose. In addition, a scenario of (targeted) separate antihypertensive and/or statin medication was simulated.

### Main outcome measures

Cases of acute myocardial infarction or stroke prevented, QALYs gained, and the costs per QALY gained. All interventions were compared with usual care.

### Results

All scenarios were cost-effective with an incremental cost-effectiveness ratio between €8,700-12,000 per QALY compared with usual care. Most health gains were achieved with the polypill without aspirin and containing a double dose of statins. With a 10-year risk of 7.5% as threshold, this pill would prevent approximately 3.5% of all cardiovascular events.

### Conclusion

Opportunistic screening based on global cardiovascular risk assessment followed by polypill prescription to those with increased risk offers a cost-effective strategy. Most health gain is achieved by the polypill without aspirin and a double statin dose.

## Article summary

### Article focus

- Cardiovascular diseases (CVD) continue to be still a major, partly preventable, cause of illness and death.
- A polypill that lowers by targeting several risk factors simultaneously, is in line with the concept that the aim in primary prevention should be to bring down ‘global’ cardiovascular risk.
- Identifying individuals at increased risk using a risk score followed by offering a drug lowering global risk seems a ‘logical’ strategy to prevent cardiovascular disease.
- The aim of this study was to estimate the potential cost-effectiveness of polypill prescription after opportunistic screening in the primary prevention of cardiovascular disease.

### Key messages

- The results of this study suggest that opportunistic screening and offering a polypill to people with a minimum 10-year risk of cardiovascular mortality of alternatively 5%, 7.5% or 10% is a cost-effective strategy in the primary prevention of cardiovascular diseases.
- A polypill without aspirin but with a double dose of simvastatin leads to most health gains at all risk thresholds considered. At a 10 year risk of cardiovascular death of 7.5% or above, such a strategy would lead to an estimated decrease in the incidence of myocardial infarction and stroke of about 3.5%, at a cost of €9,800 per QALY.
- Opportunistic screening of the population of 40 years or above to select individuals with a mild to moderately increased risk for cardiovascular diseases, followed by polypill prescription would prevent approximately 3.5% of all cardiovascular events.

### Strengths and limitation of this study

- Strong point of the study is that different compositions of the polypill (with and without the addition of aspirin, different doses of statins) have been modeled. Also, realistic estimates for compliance and adherence have been used.
- As only preliminary results of a phase II clinical trial on efficacy of the polypill were available, we had to apply mathematical modeling to estimate cost-effectiveness. This provides insight into the range of health benefits that can be expected. Pending results with regard to established clinical endpoints from large-scale phase III trials, the results of this study should not be taken as a precise estimate of the cost-effectiveness of the polypill.

## Introduction

In a by now famous article in the British Medical Journal in 2003, Wald and Law suggested that a 'polypill' could be of great benefit in the prevention of cardiovascular disease<sup>1</sup>. As originally proposed, such a pill would consist of a combination of drugs with proven efficacy and safety in reducing cardiovascular risk, in particular three different types of blood pressure lowering drugs (a beta-blocker, an antidiuretic and an ACE inhibitor), one lipid lowering drug, an antiplatelet agent (aspirin), and folic acid to reduce serum homocysteine. In combination, lower dosages could be used resulting in greater efficacy than single medication with a more favorable safety profile than higher dosages of individual drugs.

Cardiovascular diseases (CVD) are still a major cause of illness and death. For example, estimates show that in the year 2006 more than 80 million people in the United States had one or more forms of CVD<sup>2</sup>. In 2009, CVD was responsible for 29% of all deaths in the Netherlands, taking second place after cancer (32%) as the most important cause of death.<sup>3</sup> Ischemic heart disease and stroke together were responsible for 27% of all hospitalizations.<sup>4</sup> As CVD is the result of a gradual process of atherosclerosis building up over many years, the most rational strategy is stopping, or at least slowing down, the progress of plaque formation. For those whose risk factor levels put them at increased risk, life style measures or medication are available for primary prevention, but identifying who might benefit and what measures are most appropriate is subject of much discussion.<sup>5-8</sup> The recognition that atherosclerotic CVD is the product of multiple interacting risk factors has in the past decades led to new approaches in prevention. In particular, the concepts of global risk, being the aggregate risk of all risk factors together, and total CVD risk assessment have emerged as an important inspiration for developing guidelines on cardiovascular risk management.<sup>9</sup> Examples of methods of global risk assessment are the well known Framingham risk score and the SCORE (Systematic Coronary Risk Evaluation), the latter based on a pooled data set of 12 European cohort studies.<sup>10</sup> A consequence of the global risk approach is that the focus of intervention shifts from treatment of individual risk factors to placing emphasis on reducing total CVD risk, irrespective by what means. Thus, the idea of a polypill, that lowers risk by targeting more than one risk factor simultaneously, seems perfectly tailored to this strategy.<sup>11</sup> In addition, it offers the benefit of a 'one stop shop' when someone could benefit from one type of medication.

Up to the present, no evidence for the effectiveness of such a polypill exists. Yet, randomized clinical trials with several versions of a polypill have been started. The Indian Polycap Study was a phase II randomized double-blind clinical trial designed to test the effects of a version of the polypill on intermediate measures for the development of CVD, in particular blood pressure, cholesterol, heart rate, and urinary dehydrothromboxane B2.<sup>12</sup> The polypill used in

1  
2  
3 this RCT differed from the one suggested by Wald and Law by omitting folic acid, as the  
4 supposed effects of folic acid on serum homocysteine have not been confirmed.<sup>13</sup> Medication  
5 was only given for a period of 12 weeks in the Polycap study.  
6  
7

8  
9 Even though there is still no evidence regarding the efficacy of a polypill on hard endpoints  
10 (acute myocardial infarction, stroke), the extensively validated relation between blood  
11 pressure and cholesterol level on the one hand and disease risk on the other, allows a first  
12 exploration of the range of costs and benefits that might be expected from the polypill in the  
13 prevention of cardiovascular diseases.  
14  
15

16  
17 The aim of this study was to estimate the potential cost-effectiveness of the polypill in the  
18 primary prevention of myocardial infarction and ischemic stroke. In order to explore this issue  
19 a scenario of opportunistic screening in primary care was taken as point of departure. Patients  
20 were eligible for prescription of the polypill starting from a 5% risk up to 10% risk of  
21 cardiovascular death in 10 years, based on their SCORE function.<sup>14</sup>  
22  
23  
24  
25  
26  
27

## 28 **Methods**

29 We conducted a simulation study using a computer model (RIVM Chronic Disease Model-  
30 CDM) developed at our institute.<sup>15, 16</sup> Point of departure for the simulations was a scenario,  
31 in which the polypill is offered to eligible patients identified during routine visits to their GP,  
32 ('opportunistic screening'). The GP takes the initiative suggesting to patients to determine  
33 their 10-year risk for cardiovascular mortality. Those aged 40-75 years of age without known  
34 previous cardiovascular disease are eligible for the screening. Starting from risk levels of 5%  
35 or higher, people will be offered lifelong preventive medication. Cardiovascular mortality risk  
36 is assessed using the SCORE risk function developed and recommended by the European  
37 Society of Cardiology, and endorsed in the Netherlands by professional and patient's  
38 organizations.<sup>17</sup> The score function is calculated using age, sex, blood pressure, cholesterol,  
39 and smoking status as input.  
40  
41  
42  
43  
44  
45  
46

47 The current Dutch guideline for primary cardiovascular prevention, which was introduced in  
48 2006, recommends the SCORE risk charts to determine treatment recommendations. For this  
49 purpose a version of the SCORE was developed adapted to Dutch risk factor and mortality  
50 data.<sup>14</sup> It is the algorithm for this version that we used in our analyses.  
51  
52  
53

54 According to the Dutch guideline, for individuals with a 10-year risk of cardiovascular death  
55 of 10% or higher targeted drug therapy is recommended: antihypertensive treatment when  
56 SBP  $\geq$  140; statins when LDL cholesterol  $>$  2.5 mmol/L. When risk exceeds 5%, life style  
57 counseling should be considered. Aspirin is recommended for secondary prevention only.<sup>18</sup>  
58 Following the rationale that arguments for the polypill are based on the expectancy of a more  
59 favorable benefit versus safety profile, we assumed that, in a situation where a polypill would  
60

1  
2  
3 be available, it would be considered to lower the threshold for prescribing preventive  
4 medication. On the other hand, it seems unlikely prescribing the preventive medication to  
5 anyone. Especially for risks lower than 5% consensual support is needed. Therefore, in order  
6 to assess the effect of different choices for the threshold, we performed analyses for different  
7 cut points; 5%, 7.5%, and also 10%, the threshold for drug treatment of the present guideline.  
8  
9

### 12 ***The RIVM Chronic Disease Model***

14 The CDM is a computer simulation model designed to be able to simulate the evolution of  
15 several chronic diseases in relation to risk factor levels in the Dutch population. It includes the  
16 most common chronic diseases, amongst which COPD, diabetes mellitus type 2, myocardial  
17 infarction and stroke, and, besides a number of life style related risk factors, such as smoking,  
18 blood pressure and cholesterol. It may be best characterised as a Markov-type, multistate-  
19 transition model.<sup>15, 16</sup> The model describes the development over time of demography, risk  
20 factor prevalence, disease incidence, and mortality, in 1-year time steps. As input it takes the  
21 age- and sex composition of the current Dutch population and the distribution of risk factor  
22 levels in the population. It further requires specification of three types of transition  
23 probabilities (the probability of going from one state to another in 1 year time): between risk  
24 factor levels, between disease states (from no disease to disease, i.e. disease incidence, for  
25 each disease in the model), and mortality rates. Disease incidence and mortality depend on  
26 risk factor levels and the presence of other diseases via relative risks. Estimates of relative  
27 risks were derived from literature, whereas incidence, prevalence, transition rates, and  
28 mortality rates in the model apply to the Dutch population. In addition, each disease is  
29 associated with average yearly, per patient, costs, and with disability weights. All data are age  
30 and sex specific. The model further allows specifying alternative “scenarios”, by adjusting the  
31 input parameters, and comparing the results obtained with other scenarios with the ‘reference  
32 scenario (see below)’. Health care costs were based on costs-of-illness studies in the  
33 Netherlands<sup>19, 20</sup> and the healthcare outcome measure ‘quality-adjusted life year (QALY)’  
34 was computed using the Global and Dutch burden of disease studies.<sup>21-24</sup>  
35  
36  
37  
38  
39  
40  
41  
42  
43  
44  
45  
46  
47  
48

### 49 ***Scenarios***

50 Several scenarios were defined based on: 1) different cut-off levels for 10-year risk: 5%, 7.5%  
51 and 10%; 2) different compositions of the polypill. These scenarios were compared with the  
52 reference scenario of care as usual and with each other. Usual care is represented in our model  
53 in the reference scenario by the proportion of individuals currently being treated with statins  
54 and/or antihypertensive agents, based on data from the Doetinchem cohort study (details  
55 about this study follow later).<sup>25</sup> It is assumed that individuals already being treated with drugs  
56 will not switch to the polypill. We further assume that people identified as being at risk by  
57  
58  
59  
60



1  
2  
3  
4  
5  
6  
7  
8  
9  
10  
11  
12  
13  
14  
15  
16  
17  
18  
19  
20  
21  
22  
23  
24  
25  
26  
27  
28  
29  
30  
31  
32  
33  
34  
35  
36  
37  
38  
39  
40  
41  
42  
43  
44  
45  
46  
47  
48  
49  
50  
51  
52  
53  
54  
55  
56  
57  
58  
59  
60

opportunistic screening would otherwise not receive preventive medication. The different scenarios explored using the CDM model are:

1) The reference scenario represents the expected evolution of the health status and risk factor distribution of the Dutch population as simulated by the model using the basic input parameters that represent the relevant characteristics of the current Dutch population (current practice).

2) The polypill scenarios simulate the situation in which all eligible individuals, not yet treated with statins or antihypertensive agents, and selected by 'opportunistic screening', are offered lifelong medication. Besides the original Indian 'Polycap' composition, we also considered different versions of the polypill without aspirin that would avoid the bleeding risks associated with anti-platelet agents. Thus, the following alternative compositions of polypills were considered:

2A) The 'Indian Polycap', consisting of 20 mg simvastatin, 12,5 mg thiazide, 5 mg ramipril, 50 mg atenolol, 100 mg aspirin.

2B) As 2A) but without aspirin.

2C) As 2B) but with 40 mg simvastatin (double dose statins, i.e. Dutch standard dose when given as monotherapy).

Finally, an alternative scenario was defined (scenario 3: 'separate medication') in which screened individuals eligible for the polypill will not be offered the polypill, but rather medication tailored to the underlying risk factor: a statin in case of hypercholesterolemia, an anti-hypertensive in case of hypertension, both, or none (i.e. the risk score is increased, but blood pressure and hypertension are below the respective cut points).

Basically, the analyses compare the scenarios in which medication is offered in primary care to all eligible individuals in the age group 40-75 years with the scenario in which usual care is continued. The comparison thus is between a hypothetical population with one of the interventions described above and one without, where in all other respects the populations are equal at baseline and represent the current Dutch population. The model is 'run' until all have died and no 'inflow' of younger individuals is taken into account.

Below, we describe how we derived values for the relevant parameters for each scenario.

### ***Estimation of the number of eligible individuals and of the proportion who would be treated***

In order to estimate the numbers of individuals who would receive the polypill, the following steps were taken (Fig. 1).

First, the proportion of the population aged 40-75 years without a history of CVD and not yet treated with statins or antihypertensives was estimated. To this end, we applied the SCORE algorithm to the most recent data of the Doetinchem cohort study. The Doetinchem cohort

1  
2  
3 study is a prospective study of more than 5,000 inhabitants of the city of Doetinchem and  
4 surroundings who were included in the years 1987-91. Participants were aged 20-65 years at  
5 inclusion, and have been followed for more than 20 years now. So far, 4 rounds of data  
6 collection have been completed, roughly at 5-year intervals. We used the data of round 4,  
7 collected during the years 2003-2007. Among the data collected all variables necessary to  
8 calculate the SCORE are included (age, sex, SBP, LDL cholesterol, smoking status, treatment  
9 status of statins and antihypertensive). The Doetinchem cohort has been described  
10 elsewhere.<sup>25</sup> The cohort represents the best available source for the Netherlands to determine  
11 the current population distribution of risk factors.

12  
13 Next, we needed to estimate how many people would be reached by opportunistic screening.  
14 Data taken from Statistics Netherlands show that approximately 75% of the Dutch population  
15 visit their GP at least once every year.<sup>26</sup> We assumed that this figure also applies to our target  
16 population. We further assumed that the GP offers a screening consultation to all in the target  
17 population (those aged 40-75 years) in the year of the intervention, and that 50% of the  
18 invited population consent. Risk assessment consists of one consultation with GP, who  
19 explains the procedure, measures blood pressure, and draws blood for a laboratory test of  
20 blood cholesterol. The patient is then invited for a second consultation to calculate the  
21 SCORE and discuss the consequences.

22  
23 We finally assumed that of those who are offered the polypill (SCORE  $\geq$  5%, 7.5%, or 10%),  
24 or a separate statin/antihypertensive, 85% will decide to take the pill for at least one year<sup>12</sup>,  
25 and that compliance rates would stabilize at 50% after 5 years. A flow chart of the process of  
26 screening and selecting patients is shown below: for the separate medication scenario  
27 (scenario 3) we assumed that adherence (willingness to start with the therapy) to the  
28 antihypertensive was 90% and adherence to the statin was 60%<sup>27</sup>, which fraction was  
29 multiplied by the before-mentioned compliance rate to achieve total compliance (willingness  
30 to continue the therapy).

### 46 47 *Effects*

48  
49 A crucial parameter in implementing the polypill scenarios is, of course, a measure of its  
50 efficacy, in particular the relative risk reduction: the relative risk for acute myocardial  
51 infarction or stroke after taking the medication compared to the relative risk before taking it  
52 (or in a control (placebo) group). Unfortunately, as mentioned above, so far there are no data  
53 on the effects of the polypill on cardiovascular events. Instead, we will have to base our  
54 estimate on the effects on “intermediate” measures, i.e. blood pressure and cholesterol. In  
55 particular, we use the outcomes of the Indian Polycap Study.<sup>12</sup> As mentioned above, the  
56 Indian polypill consist of three blood pressure lowering drugs: hydrochlorothiazide 12.5 mg (a  
57  
58  
59  
60

diuretic), atenolol 50 mg (a  $\beta$ -blocker) and ramipril 5 mg (an angiotensin converting enzyme inhibitor), a lipid lowering drug (simvastatin 20 mg) and an antiplatelet (aspirin 100 mg). The effect of the polypill on blood pressure was a lowering of the diastolic blood pressure with 5.7 mm Hg (95% CI 4.7-6.4) and of the systolic blood pressure with 7.4 mm Hg (95% CI 6.1-8.1). The LDL cholesterol was reduced by 0.80 mmol/L (95% CI 0.62-0.78).<sup>12</sup>

These effects on blood pressure and cholesterol are substantially lower than what Law and Wald predicted. Thus, the RR reductions suggested in their article and in the accompanying meta-analysis of combination treatment with blood pressure lowering drugs<sup>28</sup> could not be relied upon for our purposes. Instead, we took as a basis the reductions in blood pressure and cholesterol observed in the Polycap study and translated these into corresponding RR reductions using meta-analyses providing estimates of these relations. Details of the meta-analyses we used and the manner we calculated the risk reductions are provided in the appendix. The calculated values we used are shown in Table 1.

**Table 1: Relative risks versus no medication (95% CI)**

| Relative risk | Statin 20 mg     | Statin 40 mg     | BPL in PP        | BPL separate     | aspirin          |
|---------------|------------------|------------------|------------------|------------------|------------------|
| Total mort.   | 0.86 (0.76-0.97) | 0.71 (0.53-0.92) | 0.91 (0.83-1.00) | 0.91 (0.83-1.00) | 1                |
| CVA           | 0.81 (0.69-0.95) | 0.61 (0.42-0.88) | 0.81 (0.70-0.94) | 0.81 (0.70-0.94) | 1                |
| AMI           | 0.75 (0.69-0.82) | 0.52 (0.42-0.62) | 0.84 (0.74-0.94) | 0.84 (0.74-0.94) | 0.82 (0.75-0.90) |

BPL: blood pressure lowering drug; PP: polypill

### Costs

Costs were determined from the perspective of the health care payer and according to the national guideline for costing research in health economic analysis.<sup>29</sup> Direct medical costs associated with diseases per patient per year were included in the CDM.<sup>19,20</sup> Costs due to all medical treatment in life years gained (indirect medical cost) are automatically included in the model.

#### Costs for screening and drug use

Unit costs, including costs for GP visits, laboratory testing, medication and drug delivery are presented in Table 2.

Costs during the first year consist of two GP visits, one laboratory test, and if indicated the costs of medication and drug delivery.

During the second and subsequent years, the costs consist of one GP visit (control visit), one laboratory test, and the costs of drug delivery.

As currently the polypill is not yet on the market, a price had to be estimated based on its "ingredients". We took as our reference the costs per mg of statins, beta-blockers, ace-inhibitors and aspirin prescribed as generics in the Netherlands, and we assumed that the price

of a pill would be the sum of the prices of its components.<sup>30</sup> Thus, the Polycap pill (scenario 1) would cost € 89.75 per year, including fees for prescription and drug delivery.

**Table 2: Intervention costs**

| Item                        | unit                           | costs per unit<br>/quantity in PP | costs per person per year                      |
|-----------------------------|--------------------------------|-----------------------------------|------------------------------------------------|
| GP visit *                  | Standard<br>consultation       | € 29                              | 58 (first year)<br>29 (subsequent years)       |
| Blood drawing<br>Laboratory |                                | Included<br>€ 1.70                | 1.80                                           |
| Drug costs **               |                                |                                   |                                                |
| Simvastatin 20mg dd         | 1 year                         | € 6.69                            | 6.69                                           |
| Simvastatin 40 mg           | 1 year                         | € 13.39                           | 13.39                                          |
| Ramipril 2.5 mg             | 1 year                         | € 22.48                           | 22.48                                          |
| Atenolol 50 mg              | 1 year                         | € 22.48                           | 22.48                                          |
| Thiazide 12.5 mg            | 1 year                         | € 3.47                            | 3.47                                           |
| Aspirin 100 mg              | 1 year                         | € 3.70                            | 3.70                                           |
| Drug delivery costs***      | First delivery<br>Per 3 months | € 5.74<br>€ 5.74                  | 28.70 (first year)<br>22.96 (subsequent years) |
| Repeat prescription***      |                                | Included in basic tariffs         |                                                |

Costs in the first year consist of 2 GP visits, one laboratory test, 4 times drug delivery, and an additional charge for first drug delivery. Costs in subsequent years: 1 GP visit plus 1 laboratory test plus 4 times drug delivery costs.

\* Fees in The Netherlands are determined by the national regulator of Healthcare tariffs: Nederlandse Zorgautoriteit (National Health Authority). In addition to costs per visit, GP's are paid for each patient registered in their practice on a yearly basis. Website <http://www.nza.nl>. Consulted on June 16, 2011.

\*\* Drug costs are based on the costs as calculated and publicized by the College for Health Insurance, which determines the prices for reimbursement (Pharmaco-therapeutic compass: <http://www.cvz.nl/kompas>)

\*\*\* According to maximum fees set for the year 2011 by National Health Authority (nza, "tariefbeschikking" nr. TB/CU-5000-01, nr. 34 [www.nza.nl](http://www.nza.nl))

#### *Costs associated with adverse effects*

Although the frequency of adverse effects of the use of statins and antihypertensive agents has consistently been reported to be very low, the risks of aspirin cannot a priori be neglected. However, in a first analysis we decided not to take these into account and, instead, consider them in a sensitivity analysis.

#### *Total costs*

1  
2  
3 Total costs were calculated by multiplying unit costs with volumes. Volumes were derived by  
4 determining the ‘numbers of units per patient’ and the numbers of patients at each stage in the  
5 process: first screening, then start therapy, first year, and finally all subsequent years of the  
6 simulation.  
7  
8  
9

### 10 11 12 ***Cost-effectiveness***

13 The main endpoint of this study was the cost-effectiveness ratio expressed as the ratio of the  
14 difference in costs and the difference in QALYs when comparing the alternative scenarios  
15 with the reference scenario (Cost/QALY)  
16

17 As the rationale for prescribing the polypill is to prevent cardiovascular disease, we also  
18 determined the numbers of myocardial infarctions and strokes prevented in the different  
19 scenarios. This was done by calculating the differences in the cumulative incidences between  
20 scenarios. Finally, these figures were used to estimate the numbers of patients that would have  
21 to be treated (NNT) to prevent one myocardial infarction, respectively stroke.  
22  
23  
24  
25  
26  
27

### 28 29 30 ***Probabilistic sensitivity analyses***

31 As several important assumptions had to be made in modeling the cost-effectiveness of the  
32 polypill, we explored the range of likely outcomes with a probabilistic multivariate sensitivity  
33 analysis. The key variables with known uncertainty were: screening acceptance, adherence to  
34 medication, relative risks for developing stroke and myocardial infarction, and the relative  
35 risk for all-cause mortality. Screening acceptance was taken to be distributed as a Beta  
36 distribution ( $\alpha=5$ ,  $\beta=5$ ) so that the average acceptance was 0.50, with a 95% CI of  
37 (0.21-0.79). First year’s adherence was taken from a Beta distribution ( $\alpha=42.5$ ,  $\beta=7.5$ )  
38 so that the average first year’s adherence was 0.85, with a 95% CI of (0.74-0.93). The relative  
39 risks were randomly taken from Beta distributions with characteristics as mentioned in Table  
40 1. We performed 350 simulations in total.  
41  
42  
43  
44  
45  
46

47 Another key parameter in the model was the price of the polypill. Because the polypill is not  
48 commercially available (yet), its price is unknown. As the best estimate, we used the sum of  
49 the costs of the separate elements of the polypill. However, if pill prices will be largely  
50 determined by production costs, it is likely that the pill will be considerably cheaper than the  
51 sum of the costs of its components. On the other hand, if, for instance the added value to the  
52 consumer of having to take one pill only will be priced in, it can not be ruled out that the price  
53 will be higher. For lack of an informed estimate of price ranges, we explored an array of  
54 possible values, in order to compare with the costs of separate medication.  
55  
56  
57  
58  
59  
60

## Results

### *Descriptives*

Table 3 shows the proportion of individuals eligible for medication based on a 10-year risk of cardiovascular mortality threshold of 5%, 7.5% or 10%. For example, with a threshold of 7.5%, of all persons between 40 and 75 year more than 31% was eligible for medication. The first half of the table concerns those eligible for the polypill, the second half those eligible for separate medication, based on having a SCORE risk of 7.5% or above together with hypertension and/or hypercholesterolemia ('separate medication scenario', scenario 3).

### *Effectiveness*

Table 4 shows that by using the polypill as described for scenario 3, the total of cases of acute myocardial infarction or stroke prevented was more than for the other medication scenarios, more than 20 and 30 thousand cases, respectively, for a threshold of 7.5% (5% and 10% not shown). It must be noted, though, that the total health gain in the separate medication scenario is only 1/3 to 1/2 of the total health gain of scenario 3.

### *Cost-effectiveness*

Table 5 shows the incremental cost-effectiveness ratios (ICERs) for all scenarios. The ratios do not differ very much between the three SCORE cut-off values considered, and are all well within accepted ICER thresholds. The main effect of choosing a different cut point is that the ICERs for the polypill scenarios decrease with lower SCORE thresholds. Opportunistic screening combined with the polypill without aspirin and doubling of the statin doses (scenario 2C) had the most favorable ICER with a SCORE threshold of 5%. For the other thresholds, separate medication has the lowest ICER. It must be noted, though, that the total health gain in the separate medication scenario is only about 1/3 to 1/2 of the total health gain of scenario 2C.

**Table 3: Individuals\* eligible for the polypill and separate medication (% of total population)**

| Risk threshold   | Polypill |      |      |       |      |      |      |      |      | Separate Medication |      |      |      |      |      |      |      |      |  |
|------------------|----------|------|------|-------|------|------|------|------|------|---------------------|------|------|------|------|------|------|------|------|--|
|                  | Men      |      |      | Wom   |      |      | Tot  |      |      | Men                 |      |      | Wom  |      |      | Tot  |      |      |  |
|                  | 5%       | 7.5% | 10%  | 5%    | 7.5% | 10%  | 5%   | 7.5% | 10%  | 5%                  | 7.5% | 10%  | 5%   | 7.5% | 10%  | 5%   | 7.5% | 10%  |  |
| <b>Age</b>       |          |      |      |       |      |      |      |      |      |                     |      |      |      |      |      |      |      |      |  |
| 40-49            | 9.1      | 2.2  | 0.4  | 0.0   | 0.0  | 0.0  | 4.0  | 1.0  | 0.2  | 8.7                 | 2.1  | 0.4  | 0.0  | 0.0  | 0.0  | 3.8  | 0.9  | 0.2  |  |
| 50-59            | 61.3     | 38.3 | 22.7 | 6.0   | 1.7  | 0.5  | 32.1 | 19.0 | 11.0 | 50.7                | 32.8 | 20.1 | 5.8  | 1.7  | 0.5  | 27.2 | 16.5 | 9.8  |  |
| 60-69            | 98.8     | 93.4 | 83.5 | 72.1  | 47.5 | 30.0 | 85.7 | 70.9 | 57.2 | 74.9                | 73.3 | 68.1 | 61.3 | 41.2 | 26.5 | 68.2 | 57.6 | 47.7 |  |
| 70-75            | 98.9     | 98.9 | 98.4 | 100.0 | 97.0 | 87.0 | 99.4 | 98.0 | 92.9 | 72.7                | 72.7 | 72.7 | 76.3 | 75.8 | 71.1 | 74.5 | 74.2 | 71.9 |  |
| All ages (40-75) | 57.4     | 46.2 | 37.7 | 25.0  | 18.0 | 13.1 | 40.3 | 31.3 | 24.7 | 46.2                | 37.8 | 31.5 | 21.9 | 16.0 | 11.9 | 33.4 | 26.3 | 21.2 |  |

\* not yet using statins or antihypertensives

**Table 4: number of cases prevented over time by the polypill intervention at a 10-years risk of 7.5%**

| Scenario<br>(PP intervention)       | AMI                             |                  |     | Stroke                          |                  |     |
|-------------------------------------|---------------------------------|------------------|-----|---------------------------------|------------------|-----|
|                                     | Number                          | Percentage       | NNT | Number                          | Percentage       | NNT |
| Expected*                           | 807 k<br><i>Cases prevented</i> |                  |     | 1374k<br><i>Cases prevented</i> |                  |     |
| Polypill Scenario 2A                | 23.8 (8.3-41.6) k               | 2.89 (1.02-5.06) | 31  | 36.1 (12.3-72.9) k              | 2.57 (0.86-5.12) | 20  |
| Polypill Scenario 2B                | 22.5 (8.3-38.8) k               | 2.73 (1.00-4.70) | 33  | 36.2 (12.3-72.9) k              | 2.57 (0.86-5.14) | 20  |
| Polypill Scenario 2C                | 29.7 (10.5-52.4) k              | 3.60 (1.30-6.34) | 25  | 47.4 (16.4-95.0) k              | 3.37 (1.17-6.78) | 15  |
| Separate medication<br>(scenario 3) | 12.8 (4.9-21.0) k               | 1.55 (0.60-2.56) | 46  | 19.9 (7.5-37.5) k               | 1.41 (0.53-2.61) | 30  |

\* according to reference scenario

NNT: Number needed to treat

1  
2  
3  
4  
5  
6  
7  
8  
9  
10  
11  
12  
13  
14  
15  
16  
17  
18  
19  
20  
21  
22  
23  
24  
25  
26  
27  
28  
29  
30  
31  
32  
33  
34  
35  
36  
37  
38  
39  
40  
41  
42  
43  
44  
45  
46  
47

**Table 5: Outcomes and ICERs (total costs per LY and QALY gained) compared to current practice. In the current practice scenario the total costs of healthcare were 675\*10<sup>9</sup>, total life years 165\*10<sup>6</sup>, and total QALYs 128\*10<sup>6</sup>.**

| Outcomes                                          | Polypill Scenario 2A |       |       | Polypill Scenario 2B |       |       | Polypill Scenario 2C |       |       | Separate medication Scenario 3 |       |     |
|---------------------------------------------------|----------------------|-------|-------|----------------------|-------|-------|----------------------|-------|-------|--------------------------------|-------|-----|
|                                                   | 5%                   | 7.5%  | 10%   | 5%                   | 7.5%  | 10%   | 5%                   | 7.5%  | 10%   | 5%                             | 7.5%  | 10% |
| <b>Risk threshold</b>                             |                      |       |       |                      |       |       |                      |       |       |                                |       |     |
| Cost of intervention (*10 <sup>6</sup> €)         | 954                  | 907   | 870   | 921                  | 876   | 840   | 967                  | 914   | 872   | 331                            | 319   | 309 |
| Incremental healthcare costs (*10 <sup>6</sup> €) | 2,210                | 1,710 | 1,320 | 1,940                | 1,500 | 1,160 | 2,240                | 1,730 | 1,330 | 750                            | 720   | 690 |
| Total incremental costs (*10 <sup>6</sup> €)      | 3,160                | 2,620 | 2,190 | 2,860                | 2,370 | 2,000 | 3,210                | 2,640 | 2,200 | 1,080                          | 1,040 | 999 |
| Life years gained (*10 <sup>3</sup> )             | 425                  | 314   | 236   | 395                  | 291   | 218   | 474                  | 349   | 261   | 154                            | 147   | 141 |
| QALYs gained (*10 <sup>3</sup> )                  | 365                  | 266   | 199   | 335                  | 244   | 182   | 408                  | 296   | 221   | 132                            | 126   | 122 |
| ICER (*10 <sup>3</sup> €/LY)                      | 7.4                  | 8.4   | 9.3   | 7.2                  | 8.2   | 9.1   | 6.8                  | 7.6   | 8.5   | 7.0                            | 7.0   | 7.1 |
| ICER (*10 <sup>3</sup> €/QALY)                    | 8.6                  | 9.8   | 11.0  | 8.5                  | 9.7   | 10.9  | 7.9                  | 8.9   | 10.0  | 8.2                            | 8.2   | 8.2 |



### *Probabilistic sensitivity analysis*

Results of the sensitivity analysis are displayed in Table 6 as 95% confidence intervals for the outcomes measures, meaning that 95% of the simulations fell within the indicated ranges. It can be observed that the incremental cost effectiveness ratio's are within a rather small range. In that respect results can be judged to be robust. Nonetheless, there is some overlap between intervals, meaning that the relative order of the different medication compositions could be different.

**Table 6: Results of the sensitivity analysis.**

| Outcomes                                             | Polypill<br>Scenario 2A | Polypill<br>Scenario 2B | Polypill<br>Scenario 2C | Separate<br>medication |
|------------------------------------------------------|-------------------------|-------------------------|-------------------------|------------------------|
| Cost of intervention (*10 <sup>6</sup> €)            | 354-1,540               | 343-1,489               | 349-1,570               | 306-341                |
| Incremental healthcare costs<br>(*10 <sup>6</sup> €) | 580-2,630               | 560-2,570               | 640-2,980               | 290-1,140              |
| Total incremental costs (*10 <sup>6</sup> €)         | 940-4,120               | 900-4,030               | 990-4,530               | 600-1,490              |
| Life years gained (*10 <sup>3</sup> )                | 113-517                 | 110-507                 | 130-613                 | 59-241                 |
| QALYs gained (*10 <sup>3</sup> )                     | 94-433                  | 92-427                  | 109-519                 | 50-206                 |
| ICER (*10 <sup>3</sup> €/LY)                         | 7.5-9.7                 | 7.4-9.6                 | 6.9-8.9                 | 5.9-10.3               |
| ICER (*10 <sup>3</sup> €/QALY)                       | 8.9-11.7                | 8.8-11.6                | 8.1-10.5                | 6.9-12.0               |

Displayed are confidence intervals (95%) of the model outcomes for a 10-years risk threshold of 7.5%.

Figure 2 displays the range of values for costs and effects (QALYs) in the cost-effectiveness plane for 7.5% risk. It shows that most values cluster narrowly along what can be imagined as a line which has as slope the average cost-effectiveness ratio.

Figure 3 shows acceptability curves for the choice of treatment strategy for 7.5% risk. For each cost-effectiveness threshold (the maximum value below which a treatment is accepted as being cost-effective, or the "willingness to pay") it gives the probability that the treatment will be cost-effective. Thus, up to a level of about €9,000/QALY, separate medication is most likely to be cost-effective, but beyond that scenario 2C is most likely the best alternative.

Variation of the costs of the most cost-effective polypill (scenario 2C) showed that when the price of the pill would be under 50 € per year (excluding drug delivery costs, and including VAT), scenario 2C would become the most favorable scenario when using a SCORE threshold of 7.5%. In the present calculations we estimated the price of the polypill in scenario 2C to be 65.76 € per year.

## **Discussion**

The results of this study suggest that opportunistic screening and offering a polypill to people with a minimum 10-year risk of cardiovascular mortality of between 5% and 10% is a cost-effective strategy in the primary prevention of cardiovascular diseases. This is the case, whether the threshold chosen is 5%, 7.5% or 10%, but the lower the threshold, the lower the incremental cost-effectiveness ratio. All three differently composed polypills were cost-

1  
2  
3 effective compared with usual care, as was the single drug option. The polypill without  
4 aspirin but with a double dose of simvastatin leads to most health gains with all risk  
5 thresholds. At a 10 year risk of cardiovascular death of 7.5% or above, such a strategy would  
6 lead to an estimated decrease in the incidence of myocardial infarction and stroke of about  
7 3.5%, at a cost of €9,800 per QALY. This is well below the consensual threshold of €20000  
8 per QALY.<sup>31</sup> Separate medication, targeted at hypertension and/or hypercholesterolemia, is  
9 the most cost-effective strategy compared to usual care in the risk classes of 7.5%,  
10 respectively 10%, or above. However, total health gains are substantially lower.

11  
12 Both the strengths and weaknesses of our study revolve around the weak basis of clinical  
13 evidence and the use of mathematical modeling. The latter allowed an exploratory  
14 investigation based on preliminary results of a phase II clinical trial, thus providing insights  
15 into the range of health benefits that can be expected. But with the lack of evidence of  
16 efficacy with regard to established clinical endpoints, the results should certainly not be taken  
17 as a precise estimate of the cost-effectiveness. We took into account what seemed to be the  
18 most important factors determining cost-effectiveness, but neglected, for instance, the costs of  
19 side effects.

20  
21 Since Wald and Law's 2003 article, the appealing idea of a highly effective and safe polypill  
22 taken once daily to prevent cardiovascular disease has gained widespread attention and steps  
23 towards realization of the concept have been taken. Several prototypes have been developed  
24 and large scale clinical trials are currently under way. Yet, the only clinical evidence so far  
25 concerns a brief randomized trial of 12 weeks of treatment, the Polycap study. On the basis of  
26 this limited evidence it was concluded that the pill seems safe and that the effects on blood  
27 pressure and cholesterol are not inferior to the individual substances given separately.  
28 However, it must be said that the effects on these intermediate endpoints fall well below the  
29 rough estimates made by Law and Wald, who calculated that up to 80% of all cardiovascular  
30 events in the population at large could be prevented. There are two main sources for the  
31 discrepancy between their estimates and our calculations. Firstly, both the estimated effects  
32 on intermediate endpoints and the relative risk reductions (per unit of risk factor level  
33 reduction) Law and Wald used seem to have been too optimistic. Secondly, we did not  
34 consider the introduction of the polypill in the "universal" manner envisioned in their original  
35 article. It seems very unlikely that medicalization of a whole population will ever find wide  
36 support. Instead, we imagined a situation in which the polypill would be introduced within the  
37 current context of cardiovascular risk management and primary prevention. This approach is  
38 in line with current views on focusing on those at increased risk and finding ways of  
39 identifying them.<sup>32</sup> Only limited experience exists with this type of primary prevention,  
40 which might be best described as opportunistic screening.<sup>38</sup> Hence, we had to make several  
41  
42  
43  
44  
45  
46  
47  
48  
49  
50  
51  
52  
53  
54  
55  
56  
57  
58  
59  
60

1  
2  
3 assumptions to estimate the number of individuals who would ultimately take the polypill.  
4 These include the preparedness of GP's to engage in opportunistic screening, the proportion  
5 of eligible individuals who are willing to choose lifelong medication, and their compliance  
6 with treatment. Many will probably prefer changing their lifestyles, or will start but not  
7 continue. A lack of compliance obviously reduces cost-effectiveness, as investments are made  
8 that do not pay out in terms of health gains. On the other hand, the combination of drugs in  
9 one pill takes away an obstacle to compliance in patients requiring more than one drug.<sup>33-35, 39</sup>  
10 Literature shows that adherence to medication declines with the number of drugs  
11 prescribed.<sup>33, 36, 37</sup>

12  
13  
14 As mentioned above, we neglected the side effects of the drugs. As far as statins are  
15 concerned, the most serious complication is rhabdomyolysis, which is very rare, but can be  
16 fatal. More frequent are complaints of muscle pain.<sup>40</sup> However, a review and meta-analysis of  
17 Weng et al., of 75 trials showed that the incidence of muscle toxicity was low in all trials.<sup>41</sup>  
18 The most recent Cochrane meta-analysis did not find significant differences between placebo  
19 and treatment groups. The most important consequence would be that the relatively minor  
20 side effects would reduce adherence, or lead to discontinuation, an effect that is indirectly  
21 included in our model (via reduced compliance). The same applies to the side-effects of the  
22 blood pressure lowering components. In particular cough caused by an ACE inhibitor, which  
23 is independent of the dose, could lead to discontinuation of the pill.<sup>28</sup> Aspirin can cause  
24 gastro-intestinal bleedings and hemorrhagic stroke.<sup>42-44</sup> The latter more or less annul the  
25 protective effect on ischemic stroke, such that the net effect is neutral. Taking the occurrence  
26 of major bleedings into account would only reinforce our conclusion that a polypill containing  
27 aspirin is the least cost-effective option.

28  
29  
30 To gain more definite insights into the cost-effectiveness of the polypill in the opportunistic  
31 screening setting we envisioned, two major "unknowns" need to be clarified. Firstly, the  
32 results of large-scale phase III clinical trials will have to show how the effects on intermediate  
33 endpoints translate into clinical benefit. In particular, they will need to answer the question  
34 whether the "sum is greater than the parts", both with regards to benefits as to safety.  
35 Secondly, more needs to be known about the willingness to participate in opportunistic  
36 screening initiatives. This applies to eligible persons, but also to general practitioners. Also  
37 the practical consequences and logistic difficulties in implementing opportunistic screening  
38 will need to be addressed.

### 39 40 41 *Implications*

42 Primary prevention is increasingly seen as a crucial tool in further reducing the burden of  
43 cardiovascular disease. In a health care system such as that of the Netherlands, in which the  
44 general practitioner occupies a central role, opportunistic screening is a feasible strategy of  
45  
46  
47  
48  
49  
50  
51  
52  
53  
54  
55  
56  
57  
58  
59  
60

1  
2  
3 which the benefits are currently being actively explored. Thus, in the Netherlands an  
4 opportunistic screening by the general practitioners has recently been introduced and  
5 reimbursement has been recommended. Obviously, in order to make most out of this  
6 opportunity, insights into the relative cost-effectiveness of alternative preventive measures for  
7 those at increased risk is essential, as are the implications on effects and costs over a long  
8 time. Low doses aspirin are not recommended in the Dutch guideline in the primary  
9 prevention of cardiovascular diseases.<sup>18</sup> This is based on the adverse effects like  
10 gastrointestinal bleedings and hemorrhagic stroke caused by aspirin<sup>42,43</sup>. The advantage of  
11 using a polypill without aspirin is that these adverse effects due to aspirin could be avoided.  
12 Since the introduction of the concept of a polypill by Wald and Law there were different  
13 changes in the composition and dosage of the medication put into this pill. One can expect  
14 that in the future further changes in the composition and dosage will lead to a better balanced  
15 pill. For example, ACE antihypertensive drugs cause often an unpleasant tickling cough.  
16 Replacement with a selective type 1 angiotensin II-receptor-(AT<sub>1</sub>-) antagonist could solve this  
17 problem.

18 Guidelines on primary prevention cardiovascular suggest first to start with life-style changes  
19 like increase the physical activity and diet advices. In our calculation we did not include the  
20 costs and the effects of a life-style advisor.

### 21 22 23 24 25 26 27 28 29 30 31 32 33 34 35 36 37 38 39 40 41 42 43 44 45 46 47 48 49 50 51 52 53 54 55 56 57 58 59 60

*Conclusion*

The polypill or variants thereof seem to offer an efficient way to reduce the cardiovascular disease burden. Opportunistic screening of the population of 40 years or above to select individuals with a mild to moderately increased risk for cardiovascular diseases, followed by polypill prescription would prevent approximately 3.5% of all cardiovascular events. The cost-effectiveness of all variants is within the same order of magnitude. Therefore other aspects will determine which composition of pill is to be preferred, such as side effect profile and total health gains. Based on these criteria, our study suggests that the polypill without aspirin and a double statin dose is the most favorable option.

**Funding** This research received no specific grant from any funding agency in the public, commercial or not-for-profit sectors

**Contributors** PFVG: study design, data-analyses, writing; EABO: study design, statistics, data-analyses; HHH: study-design, writing; GADW: study-design, writing; MVDB: writing; AJS: writing; PME: study-design, data-analyses, writing. All authors reviewed the manuscript and critically analysed the work.

## References

1. Wald NJ, Law MR. A strategy to reduce cardiovascular disease by more than 80%. *Bmj*. 2003 Jun 28;326(7404):1419.
2. AHA. Cardiovascular Disease Statistics 2010 [cited 2010 16-12]; Available from: <http://www.americanheart.org/presenter.jhtml?identifier=4478>
3. CBS. Causes of death 2009, short list. 2010 [cited 2010 0921]; Available from: [http://statline.cbs.nl/StatWeb/publication/?DM=SLNL&PA=7052\\_95&D1=0,7,42&D2=a&D3=0&D4=1&HDR=T&STB=G2,G1,G3&VW=T](http://statline.cbs.nl/StatWeb/publication/?DM=SLNL&PA=7052_95&D1=0,7,42&D2=a&D3=0&D4=1&HDR=T&STB=G2,G1,G3&VW=T)
4. Vaartjes I, van Dis I, Visseren FLJ, et al. Chapter 1: Cardiovascular disease in the Netherlands (in Dutch). Den Haag, The Netherlands: Dutch Heartfoundation; 2009.
5. Zhao G, Ford ES, Li C, et al. Are United States adults with coronary heart disease meeting physical activity recommendations? *Am J Cardiol*. 2008 Mar 1;101(5):557-61.
6. Garner JB. Problems of nonadherence in cardiology and proposals to improve outcomes. *Am J Cardiol*. 2010 May 15;105(10):1495-501.
7. Bates TR, Connaughton VM, Watts GF. Non-adherence to statin therapy: a major challenge for preventive cardiology. *Expert Opin Pharmacother*. 2009 Dec;10(18):2973-85.
8. Corrao G, Conti V, Merlino L, et al. Results of a retrospective database analysis of adherence to statin therapy and risk of nonfatal ischemic heart disease in daily clinical practice in Italy. *Clin Ther*. 2010 Feb;32(2):300-10.
9. Graham I, Atar D, Borch-Johnsen K, et al. European guidelines on cardiovascular disease prevention in clinical practice: executive summary. Fourth Joint Task Force of the European Society of Cardiology and other societies on cardiovascular disease prevention in clinical practice (constituted by representatives of nine societies and by invited experts). *Eur J Cardiovasc Prev Rehabil*. 2007 Sep;14 Suppl 2:E1-40.
10. Conroy RM, Pyorala K, Fitzgerald AP, et al. Estimation of ten-year risk of fatal cardiovascular disease in Europe: the SCORE project. *Eur Heart J*. 2003 Jun;24(11):987-1003.
11. Lonn E, Bosch J, Teo KK, et al. The polypill in the prevention of cardiovascular diseases: key concepts, current status, challenges, and future directions. *Circulation*. 2010 Nov 16;122(20):2078-88.
12. Yusuf S, Pais P, Afzal R, et al. Effects of a polypill (Polycap) on risk factors in middle-aged individuals without cardiovascular disease (TIPS): a phase II, double-blind, randomised trial. *Lancet*. 2009 Apr 18;373(9672):1341-51.
13. Lonn E, Yusuf S, Arnold MJ, et al. Homocysteine lowering with folic acid and B vitamins in vascular disease. *N Engl J Med*. 2006 Apr 13;354(15):1567-77.

- 1  
2  
3  
4  
5  
6  
7  
8  
9  
10  
11  
12  
13  
14  
15  
16  
17  
18  
19  
20  
21  
22  
23  
24  
25  
26  
27  
28  
29  
30  
31  
32  
33  
34  
35  
36  
37  
38  
39  
40  
41  
42  
43  
44  
45  
46  
47  
48  
49  
50  
51  
52  
53  
54  
55  
56  
57  
58  
59  
60
14. van Dis I, Kromhout D, Geleijnse JM, et al. Evaluation of cardiovascular risk predicted by different SCORE equations: the Netherlands as an example. *Eur J Cardiovasc Prev Rehabil.* 2010 Apr;17(2):244-9.
  15. Hoogenveen RT, van Baal PH, Boshuizen HC. Chronic disease projections in heterogeneous ageing populations: approximating multi-state models of joint distributions by modelling marginal distributions. *Math Med Biol.* 2010 Mar;27(1):1-19.
  16. Jacobs-van der Bruggen MA, Bos G, Bemelmans WJ, et al. Lifestyle interventions are cost-effective in people with different levels of diabetes risk: results from a modeling study. *Diabetes Care.* 2007 Jan;30(1):128-34.
  17. De Backer G, Ambrosioni E, Borch-Johnsen K, et al. European guidelines on cardiovascular disease prevention in clinical practice. Third Joint Task Force of European and Other Societies on Cardiovascular Disease Prevention in Clinical Practice. *Eur Heart J.* 2003 Sep;24(17):1601-10.
  18. CBO. Dutch Guideline Cardiovascular Risk Management Utrecht, The Netherlands; 2006.
  19. Baal PHM, Feenstra TL, Hoogenveen RT, et al. Cost-Effectiveness analysis with the RIVM Chronic Disease Model. Bilthoven, Netherlands: Dutch National Institute for Public Health and the Environment; 2005. Report No.: 260706002.
  20. Slobbe LCJ, Kommer GJ, Smit JM, et al. Cost-of-illness in the Netherlands 2003 Bilthoven, Netherlands: National Institute for Public Health and the Environment; 2006. Report No.: RIVM rapport 270751010.
  21. Melse JM, Essink-Bot ML, Kramers PG, et al. A national burden of disease calculation: Dutch disability-adjusted life-years. Dutch Burden of Disease Group. *Am J Public Health.* 2000 Aug;90(8):1241-7.
  22. Stouthard MEA, Essink-Bot ML, Bonsel GJ. Disability weights for diseases: A modified protocol and results for a Western European region. *European Journal of Public Health.* 2000;10(1):24-30.
  23. Lopez AD, Murray CC. The global burden of disease, 1990-2020. *Nat Med.* 1998 Nov;4(11):1241-3.
  24. van Baal PH, Hoeymans N, Hoogenveen RT, et al. Disability weights for comorbidity and their influence on health-adjusted life expectancy. *Popul Health Metr.* 2006;4:1.
  25. Verschuren WM, Blokstra A, Picavet HS, et al. Cohort profile: the Doetinchem Cohort Study. *Int J Epidemiol.* 2008 Dec;37(6):1236-41.
  26. CBS. Statistics Netherlands. 2010 [cited 2010 15 December]; Available from: <http://statline.cbs.nl/StatWeb/publication/?DM=SLNL&PA=03799&D1=0-1,3-16&D2=0-2&D3=0&D4=a&HDR=G2,T,G3&STB=G1&VW=T>

- 1  
2  
3  
4  
5  
6  
7  
8  
9  
10  
11  
12  
13  
14  
15  
16  
17  
18  
19  
20  
21  
22  
23  
24  
25  
26  
27  
28  
29  
30  
31  
32  
33  
34  
35  
36  
37  
38  
39  
40  
41  
42  
43  
44  
45  
46  
47  
48  
49  
50  
51  
52  
53  
54  
55  
56  
57  
58  
59  
60
27. Chapman RH, Petrilla AA, Benner JS, et al. Predictors of adherence to concomitant antihypertensive and lipid-lowering medications in older adults: a retrospective, cohort study. *Drugs Aging*. 2008;25(10):885-92.
  28. Law MR, Wald NJ, Morris JK, et al. Value of low dose combination treatment with blood pressure lowering drugs: analysis of 354 randomised trials. *Bmj*. 2003 Jun 28;326(7404):1427.
  29. Hakkaart-van Roijen L, Tan SS, Bouwmans CAM. Manual for costing research. Methods and directive prices for economic evaluation in health care (in Dutch) Diemen: Institute for Medical Technology Assessment, Erasmus MC; 2010.
  30. CVZ. Medicijnkosten. 2010 [cited 2010 15-12]; Available from: <http://www.medicijnkosten.nl/>
  31. van den Berg M, de Wit GA, Vijgen SM, et al. [Cost-effectiveness of prevention: opportunities for public health policy in the Netherlands]. *Ned Tijdschr Geneeskd*. 2008 Jun 7;152(23):1329-34.
  32. Wald NJ, Simmonds M, Morris JK. Screening for future cardiovascular disease using age alone compared with multiple risk factors and age. *PLoS ONE*. 2011;6(5):e18742.
  33. Saini SD, Schoenfeld P, Kaulback K, et al. Effect of medication dosing frequency on adherence in chronic diseases. *Am J Manag Care*. 2009 Jun;15(6):e22-33.
  34. Pan F, Chernew ME, Fendrick AM. Impact of fixed-dose combination drugs on adherence to prescription medications. *J Gen Intern Med*. 2008 May;23(5):611-4.
  35. Gerbino PP, Shoheiber O. Adherence patterns among patients treated with fixed-dose combination versus separate antihypertensive agents. *Am J Health Syst Pharm*. 2007 Jun;64(12):1279-83.
  36. WHO. Adherence to long-term therapies: evidence for action. Geneva, Switzerland: World Health Organization; 2003.
  37. Claxton AJ, Cramer J, Pierce C. A systematic review of the associations between dose regimens and medication compliance. *Clin Ther*. 2001 Aug;23(8):1296-310.
  38. van de Kerkhof RM, Godefrooij MB, Wouda PJ, et al. [Cardiometabolic risk factors detected with a preventative screening programme]. *Ned Tijdschr Geneeskd*. 2010;154:A1860.
  39. Erdine S. Compliance with the treatment of hypertension: the potential of combination therapy. *J Clin Hypertens (Greenwich)*. 2010 Jan;12(1):40-6.
  40. Pasternak RC, Smith SC, Jr., Bairey-Merz CN, et al. ACC/AHA/NHLBI Clinical Advisory on the Use and Safety of Statins. *Circulation*. 2002 Aug 20;106(8):1024-8.
  41. Weng TC, Yang YH, Lin SJ, et al. A systematic review and meta-analysis on the therapeutic equivalence of statins. *J Clin Pharm Ther*. 2010 Apr;35(2):139-51.

- 1  
2  
3  
4  
5  
6  
7  
8  
9  
10  
11  
12  
13  
14  
15  
16  
17  
18  
19  
20  
21  
22  
23  
24  
25  
26  
27  
28  
29  
30  
31  
32  
33  
34  
35  
36  
37  
38  
39  
40  
41  
42  
43  
44  
45  
46  
47  
48  
49  
50  
51  
52  
53  
54  
55  
56  
57  
58  
59  
60
42. Sanmuganathan PS, Ghahramani P, Jackson PR, et al. Aspirin for primary prevention of coronary heart disease: safety and absolute benefit related to coronary risk derived from meta-analysis of randomised trials. *Heart*. 2001 Mar;85(3):265-71.
43. Hayden M, Pignone M, Phillips C, et al. Aspirin for the primary prevention of cardiovascular events: a summary of the evidence for the U.S. Preventive Services Task Force. *Ann Intern Med*. 2002 Jan 15;136(2):161-72.
44. Berger JS, Roncaglioni MC, Avanzini F, et al. Aspirin for the primary prevention of cardiovascular events in women and men: a sex-specific meta-analysis of randomized controlled trials; 2006 Jan 18. Report No.: 1538-3598 (Electronic).
45. Turnbull F, Neal B, Ninomiya T, et al. Effects of different regimens to lower blood pressure on major cardiovascular events in older and younger adults: meta-analysis of randomised trials. *Bmj*. 2008 May 17;336(7653):1121-3.
46. Turnbull F, Neal B, Algert C, et al. Effects of different blood pressure-lowering regimens on major cardiovascular events in individuals with and without diabetes mellitus: results of prospectively designed overviews of randomized trials. *Arch Intern Med*. 2005 Jun 27;165(12):1410-9.
47. Taylor F, Ward K, Moore TH, et al. Statins for the primary prevention of cardiovascular disease. *Cochrane Database Syst Rev*. 2011(1):CD004816.
48. Baigent C, Blackwell L, Emberson J, et al. Efficacy and safety of more intensive lowering of LDL cholesterol: a meta-analysis of data from 170,000 participants in 26 randomised trials. *Lancet*. 2010 Nov 13;376(9753):1670-81.
49. Baigent C, Keech A, Kearney PM, et al. Efficacy and safety of cholesterol-lowering treatment: prospective meta-analysis of data from 90,056 participants in 14 randomised trials of statins. *Lancet*. 2005 Oct 8;366(9493):1267-78.
50. Baigent C, Blackwell L, Collins R, et al. Aspirin in the primary and secondary prevention of vascular disease: collaborative meta-analysis of individual participant data from randomised trials. *Lancet*. 2009 May 30;373(9678):1849-60.



## Appendix

### *Effects*

As mentioned in the text, we based our estimates of the effects on the outcomes of the Indian Polycap Study.<sup>12</sup> The effect of the polypill on blood pressure was a lowering of the diastolic blood pressure with 5.7 mm Hg (95% CI 4.7-6.4) and of the systolic blood pressure with 7.4 mm Hg (95% CI 6.1-8.1). The LDL cholesterol was reduced by 0.80 mmol/L (95% CI 0.62-0.78).<sup>12</sup>

### *Blood pressure lowering*

For blood pressure, we used a recent meta-analysis of the Blood Pressure Lowering Treatment Trialists' Collaboration.<sup>45</sup> Although the published article only reported results for 'major cardiovascular events' as outcome, supplementary analyses for stroke and coronary heart disease separately were obtained from the authors. For each 5 mm Hg reduction in systolic blood pressure the following risk ratios were found: for stroke 0.83 (95% CI 0.74, 0.94) for those under 65 years of age, and of 0.91 (95% CI 0.84, 0.99) for those 65 years or older; for coronary heart disease 0.87 (95% CI 0.80, 0.95), and 0.90 (95% CI 0.84, 0.98), respectively; for total mortality, 0.92 (95% CI 0.85, 0.99), and 0.96 (95% CI 0.91, 1.02), respectively. The relation between blood pressure reduction achieved and risk reduction was found to be log-linear. Moreover, the authors compared various drug classes, and concluded that there were no differences on the effects of lowering blood pressure according to drug class. Also when combinations of drugs are given, the effect on risk has been found to depend only on the reduction in blood pressure achieved.<sup>28</sup>

Assuming the findings of this meta-analysis, we calculated the relative risks corresponding to a 7.4 mm Hg reduction by raising the risk ratios to the power (7.4/5). This resulted in the following risk ratios: for stroke, 0.76 (95% CI 0.91, 0.64) for those under 65 years of age, and 0.87 (95% CI 0.98, 0.77) for those 65 years or older; for coronary heart disease, 0.82 (95% CI 0.92, 0.72), and 0.86 (95% CI 0.96, 0.77), respectively; for total mortality, 0.88 (95% CI 0.99, 0.79), and 0.94 (95% CI 1.03, 0.87), respectively.

For separate treatment we took treatment with a diuretic or beta-blocker as standard. From a meta-analysis by the Blood Pressure Lowering Treatment Trialists' Collaboration<sup>46</sup>, which compared various blood lowering agents both with each other and to placebo, we inferred that on average a diuretic results in a reduction of 7.2 mmHg. As this is almost the same as the reduction achieved by the polypill we used the same relative risk reduction values.

### *Cholesterol lowering*

For statins, we used a recent meta-analysis by the Cochrane Collaboration on statins for the primary prevention of cardiovascular disease.<sup>47</sup> The mean difference in LDL-cholesterol between treatment groups and controls was -0.92 (95% CI -1.10, -0.74), corresponding to relative risks of 0.72 (95% CI 0.65, 0.79) for coronary events, 0.78 (95% CI 0.65, 0.94) for stroke, and 0.84 (95% CI 0.73, 0.96) for total mortality. As the reduction found in the Polycap study was 0.80, we adjusted the risk ratios reported for the meta-analysis by raising them to the power 0.80/0.92. This is based on the assumption that the risk ratio has a log-linear relation with the reduction in cholesterol level (each mmol/L reduction reduces the risk by the same factor), for which there is much evidence.<sup>48</sup> After this adjustment, we found the following risk ratios: for coronary heart disease events, this was 0.75 (95% CI 0.69, 0.82), for stroke, it was 0.81 (95% CI 0.69, 0.95), and for total mortality, it was 0.86 (95% CI 0.76, 0.97). Again, assuming the log-linearity between level reduction and risk ratios, we calculated for the double dose the following risk ratios: for coronary heart disease events, this was 0.52 (95% CI 0.42, 0.62), for stroke, it was 0.61 (95% CI 0.42, 0.88), and for total mortality, it was 0.71 (95% CI 0.53, 0.92).

In the literature no difference was found in the number of adverse events, or in the number of individuals who developed cancer or myalgia.<sup>41, 47, 49</sup>

#### *Anti-platelet effects*

A recent meta-analysis of aspirin in the primary prevention of vascular disease<sup>50</sup> found the following risk ratios for the treatment group versus the control group: any major coronary event 0.82 (0.75-0.90); No significant net effect on stroke (decrease in ischaemic strokes compensated by an increase in haemorrhagic strokes).

Table 1 gives an overview of the risk reductions used due to simvastatin, the blood pressure lowering agents, and aspirin. Relative risks of those using medication versus those without medication as used in the model are expressed separately for the different types of medication. Effects are assumed to be independent. To calculate the aggregate effect of a particular combination relative risks are multiplied.

**Table 1:** Relative risks versus no medication

| Relative risk   | Statin 20 mg | Statin 40 mg | BPL in PP | BPL separate | aspirin |
|-----------------|--------------|--------------|-----------|--------------|---------|
| Total mortality | 0.86         | 0.74         | 0.91      | 0.91         | 1       |
| CVA             | 0.81         | 0.65         | 0.81      | 0.81         | 1       |
| AMI             | 0.75         | 0.56         | 0.84      | 0.84         | 0.82    |

BPL: blood pressure lowering drug; PP: polypill

Show

Figure 15.5.a: Drummond checklist (Drummond 1996)

| Item                                                                                                                                            | Yes                                 | No                       | Not clear                | Not appropriate                     |
|-------------------------------------------------------------------------------------------------------------------------------------------------|-------------------------------------|--------------------------|--------------------------|-------------------------------------|
| <b>Study design</b>                                                                                                                             |                                     |                          |                          |                                     |
| 1. The research question is stated.                                                                                                             | <input checked="" type="checkbox"/> | <input type="checkbox"/> | <input type="checkbox"/> |                                     |
| 2. The economic importance of the research question is stated.                                                                                  | <input checked="" type="checkbox"/> | <input type="checkbox"/> | <input type="checkbox"/> |                                     |
| 3. The viewpoint(s) of the analysis are clearly stated and justified.                                                                           | <input checked="" type="checkbox"/> | <input type="checkbox"/> | <input type="checkbox"/> |                                     |
| 4. The rationale for choosing alternative programmes or interventions compared is stated.                                                       | <input checked="" type="checkbox"/> | <input type="checkbox"/> | <input type="checkbox"/> |                                     |
| 5. The alternatives being compared are clearly described.                                                                                       | <input checked="" type="checkbox"/> | <input type="checkbox"/> | <input type="checkbox"/> |                                     |
| 6. The form of economic evaluation used is stated.                                                                                              | <input checked="" type="checkbox"/> | <input type="checkbox"/> | <input type="checkbox"/> |                                     |
| 7. The choice of form of economic evaluation is justified in relation to the questions addressed.                                               | <input checked="" type="checkbox"/> | <input type="checkbox"/> | <input type="checkbox"/> |                                     |
| <b>Data collection</b>                                                                                                                          |                                     |                          |                          |                                     |
| 8. The source(s) of effectiveness estimates used are stated.                                                                                    | <input checked="" type="checkbox"/> | <input type="checkbox"/> | <input type="checkbox"/> |                                     |
| 9. Details of the design and results of effectiveness study are given (if based on a single study).                                             | <input type="checkbox"/>            | <input type="checkbox"/> | <input type="checkbox"/> | <input checked="" type="checkbox"/> |
| 10. Details of the methods of synthesis or meta-analysis of estimates are given (if based on a synthesis of a number of effectiveness studies). | <input checked="" type="checkbox"/> | <input type="checkbox"/> | <input type="checkbox"/> | <input type="checkbox"/>            |
| 11. The primary outcome measure(s) for the economic evaluation are clearly stated.                                                              | <input checked="" type="checkbox"/> | <input type="checkbox"/> | <input type="checkbox"/> |                                     |
| 12. Methods to value benefits are stated.                                                                                                       | <input type="checkbox"/>            | <input type="checkbox"/> | <input type="checkbox"/> | <input checked="" type="checkbox"/> |
| 13. Details of the subjects from whom valuations were obtained were given.                                                                      | <input type="checkbox"/>            | <input type="checkbox"/> | <input type="checkbox"/> | <input checked="" type="checkbox"/> |
| 14. Productivity changes (if included) are reported separately.                                                                                 | <input type="checkbox"/>            | <input type="checkbox"/> | <input type="checkbox"/> | <input checked="" type="checkbox"/> |
| 15. The relevance of productivity changes to the study question is discussed.                                                                   | <input type="checkbox"/>            | <input type="checkbox"/> | <input type="checkbox"/> | <input checked="" type="checkbox"/> |
| 16. Quantities of resource use are reported separately from their unit costs.                                                                   | <input checked="" type="checkbox"/> | <input type="checkbox"/> | <input type="checkbox"/> |                                     |
| 17. Methods for the estimation of quantities and unit costs are described.                                                                      | <input checked="" type="checkbox"/> | <input type="checkbox"/> | <input type="checkbox"/> |                                     |
| 18. Currency and price data are recorded.                                                                                                       | <input checked="" type="checkbox"/> | <input type="checkbox"/> | <input type="checkbox"/> |                                     |
| 19. Details of currency of price adjustments for inflation or currency conversion are given.                                                    | <input type="checkbox"/>            | <input type="checkbox"/> | <input type="checkbox"/> | <input checked="" type="checkbox"/> |
| 20. Details of any model used are given.                                                                                                        | <input checked="" type="checkbox"/> | <input type="checkbox"/> | <input type="checkbox"/> | <input type="checkbox"/>            |
| 21. The choice of model used and the key parameters on which it is based are justified.                                                         | <input checked="" type="checkbox"/> | <input type="checkbox"/> | <input type="checkbox"/> | <input type="checkbox"/>            |
| <b>Analysis and interpretation of results</b>                                                                                                   |                                     |                          |                          |                                     |
| 22. Time horizon of costs and benefits is stated.                                                                                               | <input checked="" type="checkbox"/> | <input type="checkbox"/> | <input type="checkbox"/> | <input type="checkbox"/>            |
| 23. The discount rate(s) is stated.                                                                                                             | <input checked="" type="checkbox"/> | <input type="checkbox"/> | <input type="checkbox"/> | <input type="checkbox"/>            |
| 24. The choice of discount rate(s) is justified.                                                                                                | <input checked="" type="checkbox"/> | <input type="checkbox"/> | <input type="checkbox"/> | <input type="checkbox"/>            |
| 25. An explanation is given if costs and benefits are not discounted.                                                                           | <input type="checkbox"/>            | <input type="checkbox"/> | <input type="checkbox"/> | <input checked="" type="checkbox"/> |
| 26. Details of statistical tests and confidence intervals are given for stochastic data.                                                        | <input checked="" type="checkbox"/> | <input type="checkbox"/> | <input type="checkbox"/> | <input type="checkbox"/>            |
| 27. The approach to sensitivity analysis is given.                                                                                              | <input checked="" type="checkbox"/> | <input type="checkbox"/> | <input type="checkbox"/> | <input type="checkbox"/>            |
| 28. The choice of variables for sensitivity analysis is justified.                                                                              | <input checked="" type="checkbox"/> | <input type="checkbox"/> | <input type="checkbox"/> | <input type="checkbox"/>            |
| 29. The ranges over which the variables are varied are justified.                                                                               | <input checked="" type="checkbox"/> | <input type="checkbox"/> | <input type="checkbox"/> | <input type="checkbox"/>            |
| 30. Relevant alternatives are compared.                                                                                                         | <input checked="" type="checkbox"/> | <input type="checkbox"/> | <input type="checkbox"/> | <input type="checkbox"/>            |
| 31. Incremental analysis is reported.                                                                                                           | <input checked="" type="checkbox"/> | <input type="checkbox"/> | <input type="checkbox"/> | <input type="checkbox"/>            |
| 32. Major outcomes are presented in a disaggregated as well as aggregated form.                                                                 | <input checked="" type="checkbox"/> | <input type="checkbox"/> | <input type="checkbox"/> |                                     |
| 33. The answer to the study question is given.                                                                                                  | <input checked="" type="checkbox"/> | <input type="checkbox"/> | <input type="checkbox"/> |                                     |
| 34. Conclusions follow from the data reported.                                                                                                  | <input checked="" type="checkbox"/> | <input type="checkbox"/> | <input type="checkbox"/> |                                     |
| 35. Conclusions are accompanied by the appropriate caveats.                                                                                     | <input checked="" type="checkbox"/> | <input type="checkbox"/> | <input type="checkbox"/> |                                     |

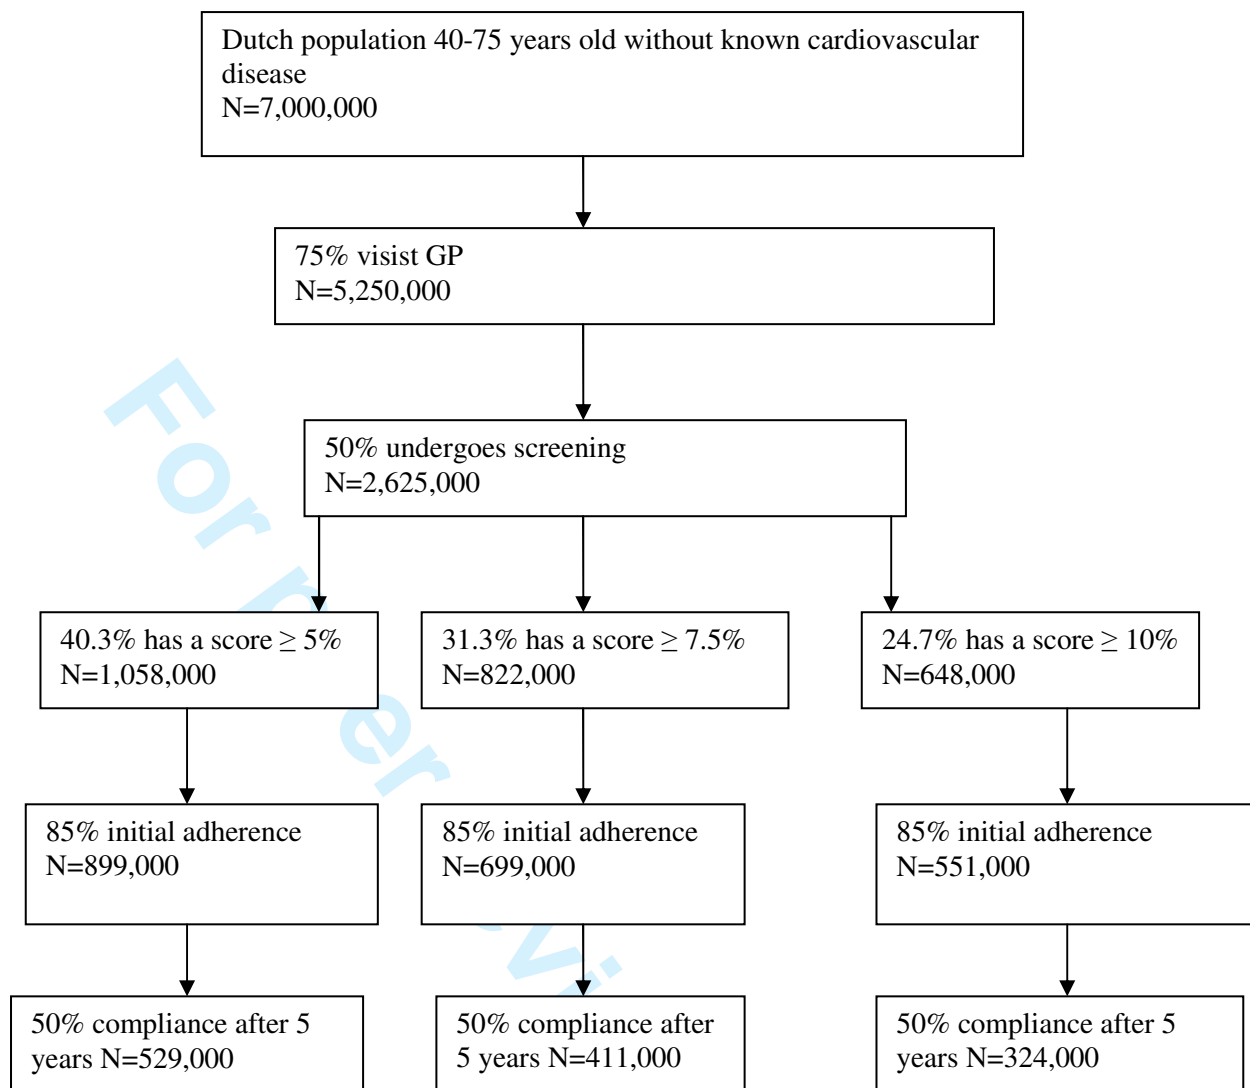

Figure 1. Flow chart of participation

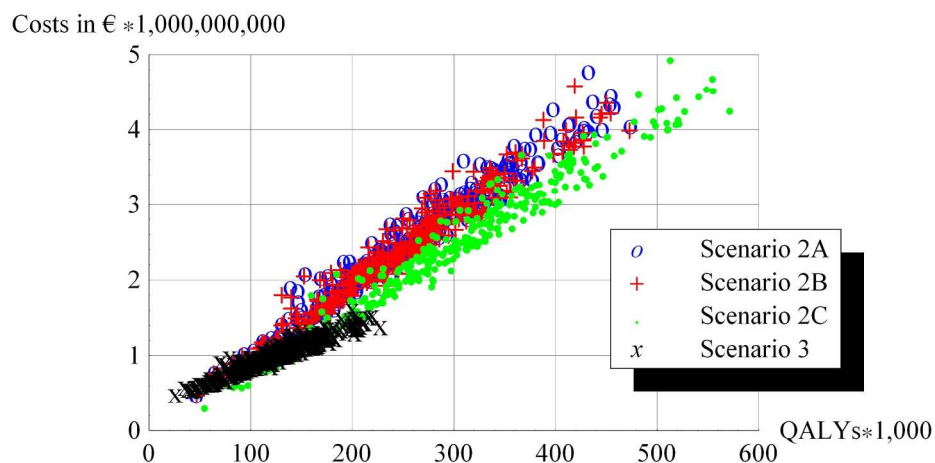

Figure 2. Scatterplot of costs versus QALY's  
1058x661mm (72 x 72 DPI)

Review only

1  
2  
3  
4  
5  
6  
7  
8  
9  
10  
11  
12  
13  
14  
15  
16  
17  
18  
19  
20  
21  
22  
23  
24  
25  
26  
27  
28  
29  
30  
31  
32  
33  
34  
35  
36  
37  
38  
39  
40  
41  
42  
43  
44  
45  
46  
47  
48  
49  
50  
51  
52  
53  
54  
55  
56  
57  
58  
59  
60

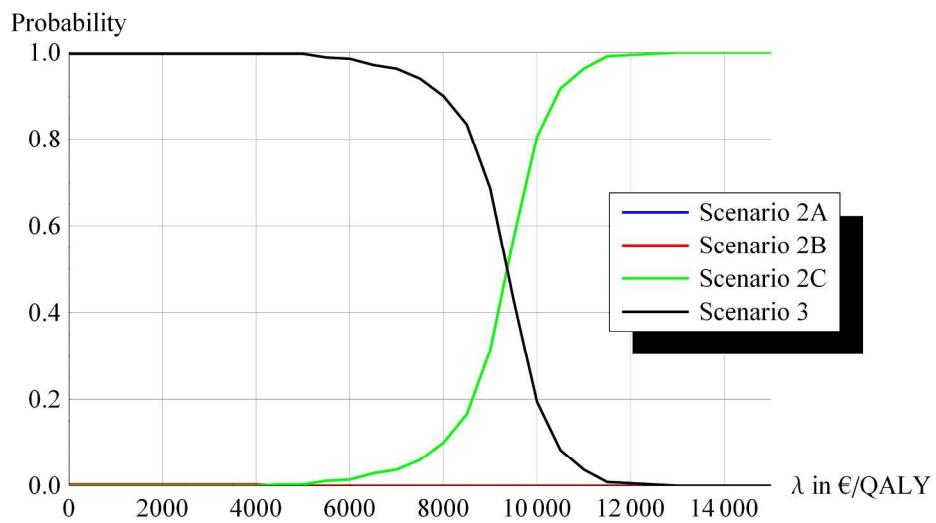

Figure 3. Acceptability curves for the choice of treatment strategy  
1058x661mm (72 x 72 DPI)

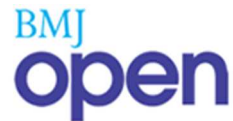

**The polypill in the primary prevention of cardiovascular disease: cost-effectiveness in the Dutch population.**

|                                 |                                                                                                                                                                                                                                                                                                                                                                                                                                                                                                                                                                                                                                                                                                                                                                              |
|---------------------------------|------------------------------------------------------------------------------------------------------------------------------------------------------------------------------------------------------------------------------------------------------------------------------------------------------------------------------------------------------------------------------------------------------------------------------------------------------------------------------------------------------------------------------------------------------------------------------------------------------------------------------------------------------------------------------------------------------------------------------------------------------------------------------|
| Journal:                        | <i>BMJ Open</i>                                                                                                                                                                                                                                                                                                                                                                                                                                                                                                                                                                                                                                                                                                                                                              |
| Manuscript ID:                  | bmjopen-2011-000363.R1                                                                                                                                                                                                                                                                                                                                                                                                                                                                                                                                                                                                                                                                                                                                                       |
| Article Type:                   | Research                                                                                                                                                                                                                                                                                                                                                                                                                                                                                                                                                                                                                                                                                                                                                                     |
| Date Submitted by the Author:   | 02-Nov-2011                                                                                                                                                                                                                                                                                                                                                                                                                                                                                                                                                                                                                                                                                                                                                                  |
| Complete List of Authors:       | van Gils, Paul; National Institute for Public Health and the Environment, Centre for Prevention and Health Services Research<br>Over, Eelco; National Institute for Public Health and the Environment, Centre for Prevention and Health Services Research<br>Hamberg, Heleen; National Institute for Public Health and the Environment, Centre for Public Health Forecasting<br>de Wit, G. Ardine; National Institute for Public Health and the Environment, Centre for Prevention and Health Services Research<br>van den Berg, Matthijs; National Institute for Public Health and the Environment, Centre for Public Health Forecasting<br>Engelfriet, Peter; National Institute for Public Health and the Environment, Centre for Prevention and Health Services Research |
| <b>Primary Subject Heading</b>: | Cardiovascular medicine                                                                                                                                                                                                                                                                                                                                                                                                                                                                                                                                                                                                                                                                                                                                                      |
| Secondary Subject Heading:      | Pharmacology & therapeutics, Health economics, Public health                                                                                                                                                                                                                                                                                                                                                                                                                                                                                                                                                                                                                                                                                                                 |
| Keywords:                       | Myocardial infarction < CARDIOLOGY, HEALTH ECONOMICS, PUBLIC HEALTH, Stroke < NEUROLOGY                                                                                                                                                                                                                                                                                                                                                                                                                                                                                                                                                                                                                                                                                      |
|                                 |                                                                                                                                                                                                                                                                                                                                                                                                                                                                                                                                                                                                                                                                                                                                                                              |

SCHOLARONE™  
Manuscripts

1  
2  
3 **The polypill in the primary prevention of cardiovascular disease: cost-**  
4 **effectiveness in the Dutch population.**  
5

6 *Paul F. van Gils<sup>1</sup>, Eelco A.B. Over<sup>1</sup>, Heleen H. Hamberg-van Reenen<sup>2</sup>, G. Ardine de Wit<sup>1</sup>,*  
7 *Matthijs van den Berg<sup>2</sup>, Albertine J. Schuit<sup>1</sup> en Peter M. Engelfriet<sup>1</sup>*  
8  
9

10  
11 <sup>1</sup>National Institute for Public Health and the Environment, Centre for Prevention and Health  
12 Services Research, Bilthoven, The Netherlands

13 <sup>2</sup>National Institute for Public Health and the Environment, Centre for Public Health  
14 Forecasting, Bilthoven, the Netherlands  
15

16 Paul van Gils, MSc  
17 Centre for Prevention and Health Services Research  
18 National Institute of Public Health and the Environment  
19 PO Box 1  
20 3723 BA Bilthoven  
21 The Netherlands  
22 Telephone: +31 302748581  
23 Fax: + 31 30 274 4407  
24 Email: [paul.van.gils@rivm.nl](mailto:paul.van.gils@rivm.nl)  
25

26 Eelco A.B. Over, PhD  
27 Centre for Prevention and Health Services Research  
28 National Institute of Public Health and the Environment  
29 PO Box 1  
30 3723 BA Bilthoven  
31 The Netherlands  
32 Telephone: +31 302742700  
33 Fax: + 31 30 274 4407  
34 Email: [eelco.over@rivm.nl](mailto:eelco.over@rivm.nl)  
35

36 Heleen H. Hamberg, PhD  
37 Centre for Public Health Forecasting  
38 National Institute for Public Health and the Environment  
39 P.O. box 1  
40 3720 BA Bilthoven  
41 The Netherlands  
42 Telephone: +31 30 2742735  
43 Fax: +31 30 2744450  
44 Email: [heleen.hamberg@rivm.nl](mailto:heleen.hamberg@rivm.nl)  
45

46 G.Ardine de Wit, PhD  
47 Centre for Prevention and Health Services Research  
48 National Institute of Public Health and the Environment  
49 PO Box 1  
50 3720 BA Bilthoven  
51 The Netherlands  
52 Telephone: + 31 30 274 3206  
53 Fax: + 31 30 274 4407  
54 Email: [ardine.de.wit@rivm.nl](mailto:ardine.de.wit@rivm.nl)  
55  
56  
57  
58  
59  
60



1  
2  
3  
4 M. van den Berg, PhD  
5 Centre for Public Health Forecasting  
6 National Institute for Public Health and the Environment  
7 P.O. box 1  
8 3720 BA Bilthoven  
9 The Netherlands  
10 Telephone: +31 30 2743349  
11 Fax: +31 30 2744450  
12 Email: [matthijs.van.den.berg@rivm.nl](mailto:matthijs.van.den.berg@rivm.nl)  
13

14 Albertine J. Schuit, PhD  
15 Centre for Prevention and Health Services Research  
16 National Institute of Public Health and the Environment  
17 PO Box 1  
18 3720 BA Bilthoven  
19 The Netherlands  
20 Telephone: + 31 30 274 2945  
21 Fax: + 31 30 274 4407  
22 Email: [janinte.schuit@rivm.nl](mailto:janinte.schuit@rivm.nl)  
23

24 Peter M. Engelfriet, MD, PhD  
25 Centre for Prevention and Health Services Research  
26 National Institute of Public Health and the Environment  
27 PO Box 1  
28 3720 BA Bilthoven  
29 The Netherlands  
30 Telephone: + 31 30 274 4388  
31 Fax: + 31 30 274 4407  
32 Email: [peter.engelfriet@rivm.nl](mailto:peter.engelfriet@rivm.nl)  
33

34 Correspondence: Paul van Gils  
35 Centre for Prevention and Health Services Research (pb 101)  
36 National Institute of Public Health and the Environment  
37 PO Box 1  
38 3720 BA Bilthoven  
39 The Netherlands  
40  
41 [Paul.van.gils@rivm.nl](mailto:Paul.van.gils@rivm.nl)  
42 Phone: + 31 30 2748581  
43 Fax: + 31 30 274 4407  
44  
45

#### 46 **Conflict of interest statement**

47 We declare that no conflict of interest exists for any of the authors.  
48

49  
50 The Corresponding Author has the right to grant on behalf of all authors and does grant on  
51 behalf of all authors, an exclusive licence (or non exclusive for government employees) on a  
52 worldwide basis to the BMJ Publishing Group Ltd and its Licensees to permit this article (if  
53 accepted) to be published in BMJ editions and any other BMJPGJL products and sublicences  
54 to exploit all subsidiary rights, as set out in our licence  
55  
56  
57  
58  
59  
60

## ABSTRACT

### Objectives

The aim of the present study was to estimate the cost-effectiveness of the polypill in the primary prevention of cardiovascular disease.

### Design

A health economic modeling study.

### Setting

Primary health care in the Netherlands.

### Participants

Simulated individuals from the general Dutch population, aged 45-75 years of age

### Interventions

Opportunistic screening followed by prescription of the polypill to eligible individuals. Eligibility was defined as having a minimum 10-year risk of cardiovascular death as assessed with the SCORE function of alternatively 5%, 7.5%, or 10%. Different versions of the polypill were considered, depending on composition: 1) the Indian polycap, with three different types of blood pressure lowering drugs, a statin, and aspirin; 2) as 1) but without aspirin; 3) as 2) but with a double statin dose. In addition, a scenario of (targeted) separate antihypertensive and/or statin medication was simulated.

### Primary outcome measures

Cases of acute myocardial infarction or stroke prevented, QALYs gained, and the costs per QALY gained. All interventions were compared with usual care.

### Results

All scenarios were cost-effective with an incremental cost-effectiveness ratio between €7,900-12,300 per QALY compared with usual care. Most health gains were achieved with the polypill without aspirin and containing a double dose of statins. With a 10-year risk of 7.5% as threshold, this pill would prevent approximately 3.5% of all cardiovascular events.

### Conclusions

Opportunistic screening based on global cardiovascular risk assessment followed by polypill prescription to those with increased risk offers a cost-effective strategy. Most health gain is achieved by the polypill without aspirin and a double statin dose.

## Article summary

### Article focus

- Cardiovascular diseases (CVD) continue to be still a major, partly preventable, cause of illness and death.
- A polypill that lowers by targeting several risk factors simultaneously is in line with the concept that the aim in primary prevention should be to bring down ‘global’ cardiovascular risk.
- The aim of this study was to estimate the potential cost-effectiveness of polypill prescription after opportunistic screening.

### Key messages

- The results of this study suggest that opportunistic screening and offering a polypill to people with a minimum 10-year risk of cardiovascular mortality of alternatively 5%, 7.5% or 10% is a cost-effective strategy.
- A polypill without aspirin but with a double dose of simvastatin leads to most health gains at all risk thresholds considered. At a 10 year risk of cardiovascular death of 7.5% or above, such a strategy would lead to an estimated decrease in the incidence of myocardial infarction and stroke of about 3.5%, at a cost of €8,900 per QALY.
- Opportunistic screening of the population of 40 years or above to select individuals with a mild to moderately increased risk for cardiovascular diseases, followed by polypill prescription would prevent approximately 3.5% of all cardiovascular events.

### Strengths and limitation of this study

- Strong point of the study is that different compositions of the polypill have been modelled. Also, realistic estimates for adherence and compliance have been used.
- As only preliminary results of a phase II clinical trial on efficacy of the polypill were available, we had to apply mathematical modelling to estimate cost-effectiveness. This provides insight into the range of health benefits that can be expected. Pending results with regard to established clinical endpoints from large-scale phase III trials, the results of this study should not be taken as a precise estimate of the cost-effectiveness of the polypill.

## Introduction

In a by now famous article in the British Medical Journal in 2003, Wald and Law suggested that a 'polypill' could be of great benefit in the prevention of cardiovascular disease<sup>1</sup>. As originally proposed, such a pill would consist of a combination of drugs with proven efficacy and safety in reducing cardiovascular risk, in particular three different types of blood pressure lowering drugs (a beta-blocker, an antidiuretic and an ACE inhibitor), one lipid lowering drug, an antiplatelet agent (aspirin), and folic acid to reduce serum homocysteine. In combination, lower dosages could be used resulting in greater efficacy than single medication with a more favorable safety profile than higher dosages of individual drugs.

Cardiovascular diseases (CVD) are still a major cause of illness and death. For example, estimates show that in the year 2006 more than 80 million people in the United States had one or more forms of CVD<sup>2</sup>. In 2009, CVD was responsible for 29% of all deaths in the Netherlands, taking second place after cancer (32%) as the most important cause of death.<sup>3</sup> Ischemic heart disease and stroke together were responsible for 27% of all hospitalizations.<sup>4</sup> As CVD is the result of a gradual process of atherosclerosis building up over many years, the most rational strategy is stopping, or at least slowing down, the progress of plaque formation. For those whose risk factor levels put them at increased risk, life style measures or medication are available for primary prevention, but identifying who might benefit and what measures are most appropriate is subject of much discussion.<sup>5-8</sup> The recognition that atherosclerotic CVD is the product of multiple interacting risk factors has in the past decades led to new approaches in prevention. In particular, the concepts of global risk, being the aggregate risk of all risk factors together, and total CVD risk assessment have emerged as an important inspiration for developing guidelines on cardiovascular risk management.<sup>9</sup> Examples of methods of global risk assessment are the well known Framingham risk score and the SCORE (Systematic Coronary Risk Evaluation), the latter based on a pooled data set of 12 European cohort studies.<sup>10</sup> A consequence of the global risk approach is that the focus of intervention shifts from treatment of individual risk factors to placing emphasis on reducing total CVD risk, irrespective by what means. Thus, the idea of a polypill, that lowers risk by targeting more than one risk factor simultaneously, seems perfectly tailored to this strategy.<sup>11</sup> In addition, it offers the benefit of a 'one stop shop' when someone could benefit from one type of medication.

Up to the present, no evidence for the effectiveness of such a polypill exists. Yet, randomized clinical trials with several versions of a polypill have been started. The Indian Polycap Study was a phase II randomized double-blind clinical trial designed to test the effects of a version of the polypill on intermediate measures for the development of CVD, in particular blood pressure, cholesterol, heart rate, and urinary dehydrothromboxane B2.<sup>12</sup> The polypill used in

1  
2  
3 this RCT differed from the one suggested by Wald and Law by omitting folic acid, as the  
4 supposed effects of folic acid on serum homocysteine have not been confirmed.<sup>13</sup> Medication  
5 was only given for a period of 12 weeks in the Polycap study.  
6  
7

8 Even though there is still no evidence regarding the efficacy of a polypill on hard endpoints  
9 (acute myocardial infarction, stroke), the extensively validated relation between blood  
10 pressure and cholesterol level on the one hand and disease risk on the other, allows a first  
11 exploration of the range of costs and benefits that might be expected from the polypill in the  
12 prevention of cardiovascular diseases.  
13  
14

15 The aim of this study was to estimate the potential cost-effectiveness of the polypill in the  
16 primary prevention of myocardial infarction and ischemic stroke. In order to explore this issue  
17 a scenario of opportunistic screening in primary care was taken as point of departure. Patients  
18 were eligible for prescription of the polypill starting from a 5% risk up to 10% risk of  
19 cardiovascular death in 10 years, based on their SCORE function.<sup>14</sup>  
20  
21  
22  
23  
24  
25

## 26 **Methods**

27 We conducted a simulation study using a computer model (RIVM Chronic Disease Model-  
28 CDM) developed at our institute.<sup>15 16</sup> Point of departure for the simulations was a scenario, in  
29 which the polypill is offered to eligible patients identified during routine visits to their GP,  
30 ('opportunistic screening'). The GP takes the initiative suggesting to patients to determine  
31 their 10-year risk for cardiovascular mortality. Those aged 40-75 years of age without known  
32 previous cardiovascular disease are eligible for the screening. Starting from risk levels of 5%  
33 or higher, people will be offered lifelong preventive medication. Cardiovascular mortality risk  
34 is assessed using the SCORE risk function developed and recommended by the European  
35 Society of Cardiology, and endorsed in the Netherlands by professional and patient's  
36 organizations.<sup>17</sup> The score function is calculated using age, sex, blood pressure, cholesterol,  
37 and smoking status as input.  
38  
39

40 The current Dutch guideline for primary cardiovascular prevention, which was introduced in  
41 2006, recommends the SCORE risk charts to determine treatment recommendations. For this  
42 purpose a version of the SCORE was developed adapted to Dutch risk factor and mortality  
43 data.<sup>14</sup> It is the algorithm for this version that we used in our analyses.  
44  
45

46 According to the Dutch guideline, for individuals with a 10-year risk of cardiovascular death  
47 of 10% or higher targeted drug therapy is recommended: antihypertensive treatment when  
48 SBP  $\geq$  140; statins when LDL cholesterol  $>$  2.5 mmol/L. When risk exceeds 5%, life style  
49 counseling should be considered. Aspirin is recommended for secondary prevention only.<sup>18</sup>  
50  
51

52 Following the rationale that arguments for the polypill are based on the expectancy of a more  
53 favorable benefit versus safety profile, we assumed that, in a situation where a polypill would  
54  
55  
56  
57  
58  
59  
60

1  
2  
3 be available, it would be considered to lower the threshold for prescribing preventive  
4 medication. On the other hand, it seems unlikely prescribing the preventive medication to  
5 anyone. Especially for risks lower than 5% consensual support is needed. Therefore, in order  
6 to assess the effect of different choices for the threshold, we performed analyses for different  
7 cut points; 5%, 7.5%, and also 10%, the threshold for drug treatment of the present guideline.  
8  
9

### 10 11 ***The RIVM Chronic Disease Model***

12 The CDM is a computer simulation model designed to be able to simulate the evolution of  
13 several chronic diseases in relation to risk factor levels in the Dutch population. It includes the  
14 most common chronic diseases, amongst which COPD, diabetes mellitus type 2, myocardial  
15 infarction and stroke, and, besides a number of life style related risk factors, such as smoking,  
16 blood pressure and cholesterol. It may be best characterised as a Markov-type, multistate-  
17 transition model.<sup>15 16</sup> The model describes the development over time of demography, risk  
18 factor prevalence, disease incidence, and mortality, in 1-year time steps. As input it takes the  
19 age- and sex composition of the current Dutch population and the distribution of risk factor  
20 levels in the population. It further requires specification of three types of transition  
21 probabilities (the probability of going from one state to another in 1 year time): between risk  
22 factor levels, between disease states (from no disease to disease, i.e. disease incidence, for  
23 each disease in the model), and mortality rates. Disease incidence and mortality depend on  
24 risk factor levels and the presence of other diseases via relative risks. Estimates of relative  
25 risks were derived from literature, whereas incidence, prevalence, transition rates, and  
26 mortality rates in the model apply to the Dutch population. In addition, each disease is  
27 associated with average yearly, per patient, costs, and with disability weights. All data are age  
28 and sex specific. The model further allows specifying alternative “scenarios”, by adjusting the  
29 input parameters, and comparing the results obtained with other scenarios with the ‘reference  
30 scenario (see below)’. Health care costs were based on costs-of-illness studies in the  
31 Netherlands<sup>19 20</sup> and the healthcare outcome measure ‘quality-adjusted life year (QALY)’ was  
32 computed using the Global and Dutch burden of disease studies.<sup>21-24</sup>  
33  
34  
35  
36  
37  
38  
39  
40  
41  
42  
43  
44  
45

### 46 ***Scenarios***

47 Several scenarios were defined based on: 1) different cut-off levels for 10-year risk: 5%, 7.5%  
48 and 10%; 2) different compositions of the polypill. These scenarios were compared with the  
49 reference scenario of care as usual and with each other. Usual care is represented in our model  
50 in the reference scenario by the proportion of individuals currently being treated with statins  
51 and/or antihypertensive agents, based on data from the Doetinchem cohort study (details  
52 about this study follow later).<sup>25</sup> It is assumed that individuals already being treated with drugs  
53 will not switch to the polypill. We further assume that people identified as being at risk by  
54  
55  
56  
57  
58  
59  
60

1  
2  
3 opportunistic screening would otherwise not receive preventive medication. In other words,  
4 the polypill was prescribed only to unexposed individuals who did not already use one of the  
5 drugs included in the polypill. The different scenarios explored using the CDM model are:

6  
7 1) The reference scenario represents the expected evolution of the health status and risk factor  
8 distribution of the Dutch population as simulated by the model using the basic input  
9 parameters that represent the relevant characteristics of the current Dutch population (current  
10 practice).

11  
12 2) The polypill scenarios simulate the situation in which all eligible individuals, not yet  
13 treated with statins or antihypertensive agents, and selected by ‘opportunistic screening’, are  
14 offered lifelong medication. Besides the original Indian ‘Polycap’ composition, we also  
15 considered different versions of the polypill without aspirin that would avoid the bleeding  
16 risks associated with anti-platelet agents. Thus, the following alternative compositions of  
17 polypills were considered:

18  
19 2A) The ‘Indian Polycap’, consisting of 20 mg simvastatin, 12,5 mg thiazide, 5 mg  
20 ramipril, 50 mg atenolol, 100 mg aspirin.

21  
22 2B) As 2A) but without aspirin.

23  
24 2C) As 2B) but with 40 mg simvastatin (double dose statins, i.e. Dutch standard dose  
25 when given as monotherapy).

26  
27 Finally, an alternative scenario was defined (scenario 3: ‘separate medication’) in which  
28 screened individuals eligible for the polypill will not be offered the polypill, but rather  
29 medication tailored to the underlying risk factor: a statin in case of hypercholesterolemia, an  
30 anti-hypertensive in case of hypertension, both, or none (i.e. the risk score is increased, but  
31 blood pressure and hypertension are below the respective cut points).

32  
33 Basically, the analyses compare the scenarios in which medication is offered in primary care  
34 to all eligible individuals in the age group 40-75 years with the scenario in which usual care is  
35 continued. The comparison thus is between a hypothetical population with one of the  
36 interventions described above and one without, where in all other respects the populations are  
37 equal at baseline and represent the current Dutch population. The model is ‘run’ until all have  
38 died and no ‘inflow’ of younger individuals is taken into account.

39  
40 Below, we describe how we derived values for the relevant parameters for each scenario.

### 41 42 ***Estimation of the number of eligible individuals and of the proportion who 43 would be treated***

44  
45 In order to estimate the numbers of individuals who would receive the polypill, the following  
46 steps were taken (Fig. 1).

47  
48 First, the proportion of the population aged 40-75 years without a history of CVD and not yet  
49 treated with statins or antihypertensives was estimated. To this end, we applied the SCORE

1  
2  
3 algorithm to the most recent data of the Doetinchem cohort study. The Doetinchem cohort  
4 study is a prospective study of more than 5,000 inhabitants of the city of Doetinchem and  
5 surroundings who were included in the years 1987-91. Participants were aged 20-65 years at  
6 inclusion, and have been followed for more than 20 years now. So far, 4 rounds of data  
7 collection have been completed, roughly at 5-year intervals. We used the data of round 4,  
8 collected during the years 2003-2007. Among the data collected all variables necessary to  
9 calculate the SCORE are included (age, sex, SBP, LDL cholesterol, smoking status, treatment  
10 status of statins and antihypertensive). The Doetinchem cohort has been described  
11 elsewhere.<sup>25</sup> The cohort represents the best available source for the Netherlands to determine  
12 the current population distribution of risk factors.

13  
14  
15  
16  
17  
18 Next, we needed to estimate how many people would be reached by opportunistic screening.  
19 Data taken from Statistics Netherlands show that approximately 75% of the Dutch population  
20 visit their GP at least once every year.<sup>26</sup> We assumed that this figure also applies to our target  
21 population. We further assumed that the GP offers a screening consultation to all in the target  
22 population (those aged 40-75 years) in the year of the intervention, and that 50% of the  
23 invited population consent. Risk assessment consists of one consultation with GP, who  
24 explains the procedure, measures blood pressure, and draws blood for a laboratory test of  
25 blood cholesterol. The patient is then invited for a second consultation to calculate the  
26 SCORE and discuss the consequences.

27  
28  
29  
30  
31  
32 We finally assumed that of those who are offered the polypill (SCORE  $\geq$  5%, 7.5%, or 10%),  
33 or a separate statin/antihypertensive, 85% will decide to take the pill for at least one year<sup>12</sup>,  
34 and that compliance rates would stabilize at 50% after 5 years. A flow chart of the process of  
35 screening and selecting patients is shown below: for the separate medication scenario  
36 (scenario 3) we assumed that adherence (willingness to start with the therapy) to the  
37 antihypertensive was 90% and adherence to the statin was 60%<sup>27</sup>, which fraction was  
38 multiplied by the before-mentioned compliance rate to achieve total compliance (willingness  
39 to continue the therapy).

### 46 *Effects*

47  
48 A crucial parameter in implementing the polypill scenarios is the measure of its efficacy, in  
49 particular the relative risk reduction: the relative risk for acute myocardial infarction or stroke  
50 after taking the medication compared to the relative risk before taking it (or in a control  
51 (placebo) group). Unfortunately, as mentioned above, so far there are no data on the effects of  
52 the polypill on cardiovascular events. Instead, we will have to base our estimate on the effects  
53 on “intermediate” measures, i.e. blood pressure and cholesterol. In particular, we use the  
54 outcomes of the Indian Polycap Study.<sup>12</sup> As mentioned above, the Indian polypill consist of  
55  
56  
57  
58  
59  
60



1  
2  
3 three blood pressure lowering drugs: hydrochlorothiazide 12.5 mg (a diuretic), atenolol 50 mg  
4 (a  $\beta$ -blocker) and ramipril 5 mg (an angiotensin converting enzyme inhibitor), a lipid lowering  
5 drug (simvastatin 20 mg) and an antiplatelet (aspirin 100 mg). The effect of the polypill on  
6 blood pressure was a lowering of the diastolic blood pressure with 5.7 mm Hg (95% CI 4.7-  
7 6.4) and of the systolic blood pressure with 7.4 mm Hg (95% CI 6.1-8.1). The LDL  
8 cholesterol was reduced by 0.80 mmol/L (95% CI 0.62-0.78).<sup>12</sup>

9 These effects on blood pressure and cholesterol are substantially lower than what Law and  
10 Wald predicted. Thus, the RR reductions suggested in their article and in the accompanying  
11 meta-analysis of combination treatment with blood pressure lowering drugs<sup>28</sup> could not be  
12 relied upon for our purposes. Instead, we took as a basis the reductions in blood pressure and  
13 cholesterol observed in the Polycap study and translated these into corresponding RR  
14 reductions using meta-analyses providing estimates of these relations.  
15  
16  
17  
18  
19  
20  
21

### 22 *Blood pressure lowering*

23 For blood pressure, we used a recent meta-analysis of the Blood Pressure Lowering Treatment  
24 Trialists' Collaboration.<sup>29</sup> Although the published article only reported results for 'major  
25 cardiovascular events' as outcome, supplementary analyses for stroke and coronary heart  
26 disease separately were obtained from the authors. For each 5 mm Hg reduction in systolic  
27 blood pressure the following risk ratio's were found: for stroke 0.83 (95% CI 0.74, 0.94) for  
28 those under 65 years of age, and of 0.91 (95% CI 0.84, 0.99) for those 65 years or older; for  
29 coronary heart disease 0.87 (95% CI 0.80, 0.95), and 0.90 (95% CI 0.84, 0.98), respectively;  
30 for total mortality, 0.92 (95% CI 0.85, 0.99), and 0.96 (95% CI 0.91, 1.02), respectively. The  
31 relation between blood pressure reduction achieved and risk reduction was found to be log-  
32 linear. Moreover, the authors compared various drug classes, and concluded that there were  
33 no differences on the effects of lowering blood pressure according to drug class. Also when  
34 combinations of drugs are given, the effect on risk has been found to depend only on the  
35 reduction in blood pressure achieved.<sup>28</sup>

36 Assuming the findings of this meta-analysis, we calculated the relative risks corresponding to  
37 a 7.4 mm Hg reduction by raising the risk ratio's to the power (7.4/5). This resulted in the  
38 following risk ratios: for stroke, 0.76 (95% CI 0.91, 0.64) for those under 65 years of age, and  
39 0.87 (95% CI 0.98, 0.77) for those 65 years or older; for coronary heart disease, 0.82 (95% CI  
40 0.92, 0.72), and 0.86 (95% CI 0.96, 0.77), respectively; for total mortality, 0.88 (95% CI 0.99,  
41 0.79), and 0.94 (95% CI 1.03, 0.87), respectively.  
42  
43  
44  
45  
46  
47  
48  
49  
50  
51

52 For separate treatment we took treatment with a diuretic or beta-blocker as standard. From a  
53 meta-analysis by the Blood Pressure Lowering Treatment Trialists' Collaboration<sup>30</sup>, which  
54 compared various blood lowering agents both with each other and to placebo, we inferred that  
55  
56  
57  
58  
59  
60

1  
2  
3 on average a diuretic results in a reduction of 7.2 mmHg. As this is almost the same as the  
4 reduction achieved by the polypill we used the same relative risk reduction values.  
5  
6

### 7 *Cholesterol lowering*

8 For statins, we used a recent meta-analysis by the Cochrane Collaboration on statins for the  
9 primary prevention of cardiovascular disease.<sup>31</sup> The mean difference in LDL-cholesterol  
10 between treatment groups and controls was -0.92 (95% CI -1.10, -0.74), corresponding to  
11 relative risks of 0.72 (95% CI 0.65, 0.79) for coronary events, 0.78 (95% CI 0.65, 0.94) for  
12 stroke, and 0.84 (95% CI 0.73, 0.96) for total mortality. As the reduction found in the Polycap  
13 study was 0.80, we adjusted the risk ratios reported for the meta-analysis by raising them to  
14 the power 0.80/0.92. This is based on the assumption that the risk ratio has a log-linear  
15 relation with the reduction in cholesterol level (each mmol/L reduction reduces the risk by the  
16 same factor), for which there is much evidence.<sup>32</sup> After this adjustment, we found the  
17 following risk ratios: for coronary heart disease events, this was 0.75 (95% CI 0.69, 0.82), for  
18 stroke, it was 0.81 (95% CI 0.69, 0.95), and for total mortality, it was 0.86 (95% CI 0.76,  
19 0.97). Again, assuming the log-linearity between level reduction and risk ratios, we calculated  
20 for the double dose the following risk ratios: for coronary heart disease events, this was 0.52  
21 (95% CI 0.42, 0.62), for stroke, it was 0.61 (95% CI 0.42, 0.88), and for total mortality, it was  
22 0.71 (95% CI 0.53, 0.92).  
23  
24  
25  
26  
27  
28  
29  
30

31 In the literature no difference was found in the number of adverse events, or in the number of  
32 individuals who developed cancer or myalgia.<sup>31 33 34</sup>  
33  
34

### 35 *Anti-platelet effects*

36 A recent meta-analysis of aspirin in the primary prevention of vascular disease<sup>35</sup> found the  
37 following risk ratios for the treatment group versus the control group: any major coronary  
38 event 0.82 (0.75-0.90); No significant net effect on stroke (decrease in ischaemic strokes  
39 annulled by an increase in haemorrhagic strokes).  
40  
41  
42  
43

44 Table 1 gives an overview of the risk reductions used due to simvastatin, the blood pressure  
45 lowering agents, and aspirin. Relative risks of those using medication versus those without  
46 medication as used in the model are expressed separately for the different types of  
47 medication. Effects are assumed to be independent. To calculate the aggregate effect of a  
48 particular combination relative risks are multiplied.  
49  
50  
51  
52  
53  
54  
55  
56  
57  
58  
59  
60

**Table 1: Relative risks versus no medication (95% CI)**

| <b>Relative risk</b> | <i>Statin 20 mg</i> | <i>Statin 40 mg</i> | <i>BPL in PP</i> | <i>BPL separate</i> | <i>aspirin</i>   |
|----------------------|---------------------|---------------------|------------------|---------------------|------------------|
| Total mort.          | 0.86 (0.76-0.97)    | 0.71 (0.53-0.92)    | 0.91 (0.83-1.00) | 0.91 (0.83-1.00)    | 1                |
| CVA                  | 0.81 (0.69-0.95)    | 0.61 (0.42-0.88)    | 0.81 (0.70-0.94) | 0.81 (0.70-0.94)    | 1                |
| AMI                  | 0.75 (0.69-0.82)    | 0.52 (0.42-0.62)    | 0.84 (0.74-0.94) | 0.84 (0.74-0.94)    | 0.82 (0.75-0.90) |

BPL: blood pressure lowering drug; PP: polypill

### **Costs**

Costs were determined from the perspective of the health care payer and according to the national guideline for costing research in health economic analysis.<sup>36</sup> Direct medical costs associated with diseases per patient per year were included in the CDM.<sup>19 20</sup> Costs due to all medical treatment in life years gained (indirect medical cost) are automatically included in the model.

#### *Costs for screening and drug use*

Unit costs, including costs for GP visits, laboratory testing, medication and drug delivery are presented in Table 2.

Costs during the first year consist of two GP visits, one laboratory test, and if indicated the costs of medication and drug delivery.

During the second and subsequent years, the costs consist of one GP visit (control visit), one laboratory test, and the costs of drug delivery.

As currently the polypill is not yet on the market, a price had to be estimated based on its “ingredients”. We took as our reference the costs per mg of statins, beta-blockers, ace-inhibitors and aspirin prescribed as generics in the Netherlands, and we assumed that the price of a pill would be the sum of the prices of its components.<sup>37</sup> Thus, the Polycap pill (scenario 1) would cost € 89.75 per year, including fees for prescription and drug delivery.

**Table 2: Intervention costs**

| Item                                               | unit                           | costs per unit<br>/quantity in PP | costs per person per year                      |
|----------------------------------------------------|--------------------------------|-----------------------------------|------------------------------------------------|
| GP visit *                                         | Standard<br>consultation       | € 29                              | 58 (first year)<br>29 (subsequent years)       |
| Blood drawing<br>Laboratory                        |                                | Included<br>€ 1.70                | 1.80                                           |
| Drug costs **                                      |                                |                                   |                                                |
| Simvastatin 20mg dd                                | 1 year                         | € 6.69                            | 6.69                                           |
| Simvastatin 40 mg                                  | 1 year                         | € 13.39                           | 13.39                                          |
| Ramipril 2.5 mg                                    | 1 year                         | € 22.48                           | 22.48                                          |
| Atenolol 50 mg                                     | 1 year                         | € 22.48                           | 22.48                                          |
| Thiazide 12.5 mg                                   | 1 year                         | € 3.47                            | 3.47                                           |
| Aspirin 100 mg                                     | 1 year                         | € 3.70                            | 3.70                                           |
| Drug delivery costs***                             | First delivery<br>Per 3 months | € 5.74<br>€ 5.74                  | 28.70 (first year)<br>22.96 (subsequent years) |
| Repeat prescription***                             |                                | Included in basic tariffs         |                                                |
| Gastrointestinal<br>bleeding (adverse<br>event)*** |                                | € 3,425                           | €3,425                                         |

Costs in the first year consist of 2 GP visits, one laboratory test, 4 times drug delivery, and an additional charge for first drug delivery. Costs in subsequent years: 1 GP visit plus 1 laboratory test plus 4 times drug delivery costs.

\* Fees in The Netherlands are determined by the national regulator of Healthcare tariffs: Nederlandse Zorgautoriteit (National Health Authority). In addition to costs per visit, GP's are paid for each patient registered in their practice on a yearly basis. Website <http://www.nza.nl>. Consulted on June 16, 2011.

\*\* Drug costs are based on the costs as calculated and publicized by the College for Health Insurance, which determines the prices for reimbursement (Pharmaco-therapeutic compass: <http://www.cvz.nl/kompas>)

\*\*\* According to maximum fees set for the year 2011 by National Health Authority (nza, "tariefbeschikking" nr. TB/CU-5000-01, nr. 34 [www.nza.nl](http://www.nza.nl))

#### *Costs and effects associated with adverse events*

The frequency of adverse effects of the use of statins and antihypertensive agents has consistently been reported to be very low. We assumed that the costs and effects due to these agents are captured by taking into account nonadherence and stopping taking the pill. The adverse effects of aspirin, however, are known to be more severe. In particular, the risks of major bleedings should be taking into account. The increased risk of hemorrhagic stroke is already incorporated in our estimate of the relative risk for stroke (see above).. The costs and (negative) effects of gastrointestinal bleedings caused by the use of aspirin were added to the model in the following manner. The incidence rate of gastro-intestinal bleedings was

1  
2  
3 estimated to 8.5 per year per 1000 patients.<sup>38</sup> The loss of utility caused by gastro-intestinal  
4 bleedings was estimated to be 0.06.<sup>39</sup> The costs of gastro-intestinal bleeding were estimated at  
5 €3,425, according to the Dutch Diagnosis Related Group (DRG) tariff (www.nza.nl).  
6  
7

### 8 9 *Total costs*

10 Total costs were calculated by multiplying unit costs with volumes. Volumes were derived by  
11 determining the 'numbers of units per patient' and the numbers of patients at each stage in the  
12 process: first screening, then start therapy, first year, and finally all subsequent years of the  
13 simulation.  
14  
15

### 16 17 18 ***Cost-effectiveness***

19 The main endpoint of this study was the cost-effectiveness ratio expressed as the ratio of the  
20 difference in costs and the difference in QALYs when comparing the alternative scenarios  
21 with the reference scenario (Cost/QALY)  
22

23 As the rationale for prescribing the polypill is to prevent cardiovascular disease, we also  
24 determined the numbers of myocardial infarctions and strokes prevented in the different  
25 scenarios. This was done by calculating the differences in the cumulative incidences between  
26 scenarios. Finally, these figures were used to estimate the numbers of patients that would have  
27 to be treated (NNT) to prevent one myocardial infarction, respectively stroke. **Taking into  
28 account time preferences, future costs and effects were discounted according to the Dutch  
29 guideline, with a discount rate of 4% for costs and 1.5% for effects.<sup>36</sup> The chosen time  
30 horizon was a life-time horizon.**  
31  
32  
33  
34  
35  
36

### 37 38 ***Probabilistic sensitivity analyses***

39 As several important assumptions had to be made in modeling the cost-effectiveness of the  
40 polypill, we explored the range of likely outcomes with a probabilistic multivariate sensitivity  
41 analysis. The key variables with known uncertainty were: screening acceptance, adherence to  
42 medication, relative risks for developing stroke and myocardial infarction, and the relative  
43 risk for all-cause mortality. Screening acceptance was taken to be distributed as a Beta  
44 distribution (alpha=5, beta=5) so that the average acceptance was 0.50, with a 95% CI of  
45 (0.21-0.79). First year's adherence was taken from a Beta distribution (alpha=42.5, beta=7.5)  
46 so that the average first year's adherence was 0.85, with a 95% CI of (0.74-0.93). The relative  
47 risks were randomly taken from Beta distributions with characteristics as mentioned in Table  
48 1. We performed 350 simulations in total.  
49

50 Another key parameter in the model was the price of the polypill. Because the polypill is not  
51 commercially available (yet), its price is unknown. As the best estimate, we used the sum of  
52 the costs of the separate elements of the polypill. However, if pill prices will be largely  
53  
54  
55  
56  
57  
58  
59  
60

1  
2  
3 determined by production costs, it is likely that the pill will be considerably cheaper than the  
4 sum of the costs of its components. On the other hand, if, for instance the added value to the  
5 consumer of having to take one pill only will be priced in, it can not be ruled out that the price  
6 will be higher. For lack of an informed estimate of price ranges, we explored an array of  
7 possible values, in order to compare with the costs of separate medication. We performed also  
8 analyses with different discount rates.  
9  
10  
11

## 12 Results

### 13 *Descriptives*

14  
15  
16 Table 3 shows the proportion of individuals eligible for medication based on a 10-year risk of  
17 cardiovascular mortality threshold of 5%, 7.5% or 10%. For example, with a threshold of  
18 7.5%, of all persons between 40 and 75 year more than 31% was eligible for medication. The  
19 first half of the table concerns those eligible for the polypill, the second half those eligible for  
20 separate medication, based on having a SCORE risk of 7.5% or above together with  
21 hypertension and/or hypercholesterolemia ('separate medication scenario', scenario 3).  
22  
23  
24  
25  
26

### 27 *Effectiveness*

28  
29 Table 4 shows that by using the polypill as described for scenario 3, the total of cases of acute  
30 myocardial infarction or stroke prevented was more than for the other medication scenarios,  
31 more than 20 and 30 thousand cases, respectively, for a threshold of 7.5% (5% and 10% not  
32 shown). It must be noted, though, that the total health gain in the separate medication scenario  
33 is only 1/3 to 1/2 of the total health gain of scenario 3.  
34  
35  
36  
37

### 38 *Cost-effectiveness*

39  
40 Table 5 shows the incremental cost-effectiveness ratios (ICERs) for all scenarios. The ratio's  
41 do not differ very much between the three SCORE cut-off values considered, and are all well  
42 within accepted ICER thresholds. The main effect of choosing a different cut point is that the  
43 ICERs for the polypill scenarios decrease with lower SCORE thresholds. Opportunistic  
44 screening combined with the polypill without aspirin and doubling of the statin doses  
45 (scenario 2C) had the most favorable ICER with a SCORE threshold of 5%. For the other  
46 thresholds, separate medication has the lowest ICER. It must be noted, though, that the total  
47 health gain in the separate medication scenario is only about 1/3 to 1/2 of the total health gain  
48 of scenario 2C. We also performed separate analyses by gender and age (Table 6). For all  
49 scenarios the costs per QALY were higher for women than for men in all age-categories, but  
50 remained far below the threshold of €20,000  
51  
52  
53  
54  
55  
56  
57  
58  
59  
60

**Table 3: Individuals\* eligible for the polypill and separate medication (% of total population)**

| Risk threshold   | Polypill |      |      |       |      |      |      |      |      | Separate Medication |      |      |      |      |      |      |      |      |  |
|------------------|----------|------|------|-------|------|------|------|------|------|---------------------|------|------|------|------|------|------|------|------|--|
|                  | Men      |      |      | Wom   |      |      | Tot  |      |      | Men                 |      |      | Wom  |      |      | Tot  |      |      |  |
|                  | 5%       | 7.5% | 10%  | 5%    | 7.5% | 10%  | 5%   | 7.5% | 10%  | 5%                  | 7.5% | 10%  | 5%   | 7.5% | 10%  | 5%   | 7.5% | 10%  |  |
| <b>Age</b>       |          |      |      |       |      |      |      |      |      |                     |      |      |      |      |      |      |      |      |  |
| 40-49            | 9.1      | 2.2  | 0.4  | 0.0   | 0.0  | 0.0  | 4.0  | 1.0  | 0.2  | 8.7                 | 2.1  | 0.4  | 0.0  | 0.0  | 0.0  | 3.8  | 0.9  | 0.2  |  |
| 50-59            | 61.3     | 38.3 | 22.7 | 6.0   | 1.7  | 0.5  | 32.1 | 19.0 | 11.0 | 50.7                | 32.8 | 20.1 | 5.8  | 1.7  | 0.5  | 27.2 | 16.5 | 9.8  |  |
| 60-69            | 98.8     | 93.4 | 83.5 | 72.1  | 47.5 | 30.0 | 85.7 | 70.9 | 57.2 | 74.9                | 73.3 | 68.1 | 61.3 | 41.2 | 26.5 | 68.2 | 57.6 | 47.7 |  |
| 70-75            | 98.9     | 98.9 | 98.4 | 100.0 | 97.0 | 87.0 | 99.4 | 98.0 | 92.9 | 72.7                | 72.7 | 72.7 | 76.3 | 75.8 | 71.1 | 74.5 | 74.2 | 71.9 |  |
| All ages (40-75) | 57.4     | 46.2 | 37.7 | 25.0  | 18.0 | 13.1 | 40.3 | 31.3 | 24.7 | 46.2                | 37.8 | 31.5 | 21.9 | 16.0 | 11.9 | 33.4 | 26.3 | 21.2 |  |

\* not yet using statins or antihypertensives

**Table 4: number of cases prevented over time by the polypill intervention at a 10-years risk of 7.5%**

| Scenario<br>(PP intervention)       | AMI                    |                  |     | Stroke                 |                  |     |
|-------------------------------------|------------------------|------------------|-----|------------------------|------------------|-----|
|                                     | Number                 | Percentage       | NNT | Number                 | Percentage       | NNT |
| Expected*                           | 807 k                  |                  |     | 1374k                  |                  |     |
|                                     | <i>Cases prevented</i> |                  |     | <i>Cases prevented</i> |                  |     |
| Polypill Scenario 2A                | 23.8 (8.3-41.6) k      | 2.89 (1.02-5.06) | 31  | 36.1 (12.3-72.9) k     | 2.57 (0.86-5.12) | 20  |
| Polypill Scenario 2B                | 22.5 (8.3-38.8) k      | 2.73 (1.00-4.70) | 33  | 36.2 (12.3-72.9) k     | 2.57 (0.86-5.14) | 20  |
| Polypill Scenario 2C                | 29.7 (10.5-52.4) k     | 3.60 (1.30-6.34) | 25  | 47.4 (16.4-95.0) k     | 3.37 (1.17-6.78) | 15  |
| Separate medication<br>(scenario 3) | 12.8 (4.9-21.0) k      | 1.55 (0.60-2.56) | 46  | 19.9 (7.5-37.5) k      | 1.41 (0.53-2.61) | 30  |

\* according to reference scenario

NNT: Number needed to treat

**Table 5: Outcomes and ICERs (total costs per LY and QALY gained) compared to current practice. In the current practice scenario the total costs of healthcare were 675\*10<sup>9</sup>, total life years 165\*10<sup>6</sup>, and total QALYs 128\*10<sup>6</sup>.**

| Outcomes                                          | Polypill Scenario 2A |       |       | Polypill Scenario 2B |       |       | Polypill Scenario 2C |       |       | Separate medication Scenario 3 |       |      |
|---------------------------------------------------|----------------------|-------|-------|----------------------|-------|-------|----------------------|-------|-------|--------------------------------|-------|------|
|                                                   | Risk threshold       | 5%    | 7.5%  | 10%                  | 5%    | 7.5%  | 10%                  | 5%    | 7.5%  | 10%                            | 5%    | 7.5% |
| Cost of intervention (*10 <sup>6</sup> €)         | 954                  | 907   | 870   | 921                  | 876   | 840   | 967                  | 914   | 872   | 331                            | 319   | 309  |
| Incremental healthcare costs (*10 <sup>6</sup> €) | 2,210                | 1,710 | 1,320 | 1,940                | 1,500 | 1,160 | 2,240                | 1,730 | 1,330 | 750                            | 720   | 690  |
| Total incremental costs (*10 <sup>6</sup> €)      | 3,390                | 2,830 | 2,400 | 2,860                | 2,370 | 2,000 | 3,210                | 2,640 | 2,200 | 1,080                          | 1,040 | 999  |
| Life years gained (*10 <sup>3</sup> )             | 425                  | 314   | 236   | 395                  | 291   | 218   | 474                  | 349   | 261   | 154                            | 147   | 141  |
| QALYs gained (*10 <sup>3</sup> )                  | 360                  | 266   | 195   | 335                  | 244   | 182   | 408                  | 296   | 221   | 132                            | 126   | 122  |
| ICER (*10 <sup>3</sup> €/LY)                      | 8.0                  | 9.0   | 10.2  | 7.2                  | 8.2   | 9.1   | 6.8                  | 7.6   | 8.5   | 7.0                            | 7.0   | 7.1  |
| ICER (*10 <sup>3</sup> €/QALY)                    | 9.4                  | 10.8  | 12.3  | 8.5                  | 9.7   | 10.9  | 7.9                  | 8.9   | 10.0  | 8.2                            | 8.2   | 8.2  |

**Table 6: Outcomes and ICERs compared to current practice. Age and sex specific data for the 7.5% risk numbers in Table 5.**

| Outcomes                       | Sex\Age | Polypill Scenario 2A |       |       |       | Polypill Scenario 2B |       |       |       | Polypill Scenario 2C |       |       |       | Separate medication Scenario 3 |       |       |       |
|--------------------------------|---------|----------------------|-------|-------|-------|----------------------|-------|-------|-------|----------------------|-------|-------|-------|--------------------------------|-------|-------|-------|
|                                |         | 40-49                | 50-59 | 60-69 | 70-75 | 40-49                | 50-59 | 60-69 | 70-75 | 40-49                | 50-59 | 60-69 | 70-75 | 40-49                          | 50-59 | 60-69 | 70-75 |
| ICER (*10 <sup>3</sup> €/QALY) | Men     | 6.9                  | 7.8   | 8.3   | 11.4  | 6.0                  | 6.8   | 7.4   | 10.3  | 5.3                  | 5.9   | 6.7   | 9.6   | 4.2                            | 4.4   | 6.0   | 9.6   |
|                                | Women   | NA                   | 8.9   | 13.9  | 17.2  | NA                   | 8.7   | 13.7  | 16.7  | NA                   | 8.4   | 12.6  | 15.8  | NA                             | 8.7   | 11.0  | 14.8  |



### Probabilistic sensitivity analysis

Results of the sensitivity analysis are displayed in Table 6 as 95% confidence intervals for the outcomes measures, meaning that 95% of the simulations fell within the indicated ranges. It can be observed that the incremental cost effectiveness ratio's are within a rather small range. In that respect results can be judged to be robust. Nonetheless, there is some overlap between intervals, meaning that the relative order of the different medication compositions could be different. Table 8 shows the results of the analyses of the base case scenario with different discount rates.

**Table 7: Results of the probabilistic sensitivity analysis.**

| Outcomes                                          | Polypill Scenario 2A | Polypill Scenario 2B | Polypill Scenario 2C | Separate medication |
|---------------------------------------------------|----------------------|----------------------|----------------------|---------------------|
| Cost of intervention (*10 <sup>6</sup> €)         | 380-1,510            | 370-1,460            | 380-1,540            | 290-360             |
| Incremental healthcare costs (*10 <sup>6</sup> €) | 580-2,630            | 560-2,570            | 640-2,980            | 290-1,140           |
| Total incremental costs (*10 <sup>6</sup> €)      | 1,070-4,450          | 940-4,000            | 1,040-4,490          | 610-1,460           |
| Life years gained (*10 <sup>3</sup> )             | 113-517              | 110-507              | 130-613              | 59-241              |
| QALYs gained (*10 <sup>3</sup> )                  | 92-424               | 92-427               | 109-519              | 50-206              |
| ICER (*10 <sup>3</sup> €/LY)                      | 8.2-10.7             | 7.4-9.8              | 6.9-9.0              | 5.9-10.8            |
| ICER (*10 <sup>3</sup> €/QALY)                    | 9.9-13.0             | 8.8-11.7             | 8.1-10.7             | 6.9-12.6            |
| Outcomes                                          | Polypill Scenario 2A | Polypill Scenario 2B | Polypill Scenario 2C | Separate medication |
| Cost of intervention (*10 <sup>6</sup> €)         | 380-1,510            | 370-1,460            | 380-1,540            | 290-360             |
| Incremental healthcare costs (*10 <sup>6</sup> €) | 580-2,630            | 560-2,570            | 640-2,980            | 290-1,140           |
| Total incremental costs (*10 <sup>6</sup> €)      | 1,070-4,450          | 940-4,000            | 1,040-4,490          | 610-1,460           |
| Life years gained (*10 <sup>3</sup> )             | 113-517              | 110-507              | 130-613              | 59-241              |
| QALYs gained (*10 <sup>3</sup> )                  | 92-424               | 92-427               | 109-519              | 50-206              |
| ICER (*10 <sup>3</sup> €/LY)                      | 8.2-10.7             | 7.4-9.8              | 6.9-9.0              | 5.9-10.8            |
| ICER (*10 <sup>3</sup> €/QALY)                    | 9.9-13.0             | 8.8-11.7             | 8.1-10.7             | 6.9-12.6            |

Displayed are confidence intervals (95%) of the model outcomes for a 10-years risk threshold of 7.5%.

**Table 8: Sensitivity analyses with different discount rates (7.5% risk)**

| Discount rates: costs, effects | Polypill Scenario 2A | Polypill Scenario 2B | Polypill Scenario 2C | Separate medication Scenario 3 |
|--------------------------------|----------------------|----------------------|----------------------|--------------------------------|
| 4%, 1.5%                       | 10,800               | 9,700                | 8,900                | 8,200                          |
| 0%, 0%                         | 17,300               | 16,200               | 15,100               | 14,200                         |
| 3%, 3%                         | 16,400               | 14,900               | 13,700               | 12,600                         |
| 5%, 5%                         | 16,200               | 14,200               | 12,900               | 11,800                         |

Figure 2 displays the range of values for costs and effects (QALYs) in the cost-effectiveness plane for 7.5% risk. It shows that most values cluster narrowly along what can be imagined as a line which has as slope the average cost-effectiveness ratio.

Figure 3 shows acceptability curves for the choice of treatment strategy for 7.5% risk. For each cost-effectiveness threshold (the maximum value below which a treatment is accepted as

1  
2  
3 being cost-effective, or the “willingness to pay”) it gives the probability that the treatment  
4 will be cost-effective. Thus, up to a level of about €9,000/QALY, separate medication is most  
5 likely to be cost-effective, but beyond that scenario 2C is most likely the best alternative.  
6 Variation of the costs of the most cost-effective polypill (scenario 2C) showed that when the  
7 price of the pill would be under 50 € per year (excluding drug delivery costs, and including  
8 VAT), scenario 2C would become the most favorable scenario when using a SCORE  
9 threshold of 7.5%. In the present calculations we estimated the price of the polypill in  
10 scenario 2C to be 65.76 € per year.  
11  
12  
13  
14  
15

## 16 Discussion

17 The results of this study suggest that opportunistic screening and offering a polypill to people  
18 with a minimum 10-year risk of cardiovascular mortality of between 5% and 10% is a cost-  
19 effective strategy in the primary prevention of cardiovascular diseases. This is the case,  
20 whether the threshold chosen is 5%, 7.5% or 10%, but the lower the threshold, the lower the  
21 incremental cost-effectiveness ratio. All three differently composed polypills were cost-  
22 effective compared with usual care, as was the single drug option. The polypill without  
23 aspirin but with a double dose of simvastatin leads to most health gains with all risk  
24 thresholds. At a 10 year risk of cardiovascular death of 7.5% or above, such a strategy would  
25 lead to an estimated decrease in the incidence of myocardial infarction and stroke of about  
26 3.5%, at a cost of €8,900 per QALY. This is well below the consensual threshold of €20,000  
27 per QALY.<sup>40</sup> Separate medication, targeted at hypertension and/or hypercholesterolemia, is  
28 the most cost-effective strategy compared to usual care in the risk classes of 7.5%,  
29 respectively 10%, or above. However, total health gains are substantially lower.  
30  
31  
32  
33  
34  
35  
36  
37

38 Both the strengths and weaknesses of our study revolve around the weak basis of clinical  
39 evidence and the use of mathematical modeling. The latter allowed an exploratory  
40 investigation based on preliminary results of a phase II clinical trial, thus providing insights  
41 into the range of health benefits that can be expected. But with the lack of evidence of  
42 efficacy with regard to established clinical endpoints, the results should certainly not be taken  
43 as a precise estimate of the cost-effectiveness. We took into account what seemed to be the  
44 most important factors determining cost-effectiveness, but neglected, for instance, the costs of  
45 side effects.  
46  
47  
48  
49  
50

51 Since Wald and Law's 2003 article, the appealing idea of a highly effective and safe polypill  
52 taken once daily to prevent cardiovascular disease has gained widespread attention. Soon, the  
53 question of cost-effectiveness was raised. Thus, Franco and colleagues developed a model to  
54 estimate the maximum price the polypill could have to be cost effective in the primary  
55 prevention of cardiovascular disease.<sup>41</sup> As input, they used the hypothetical effectiveness  
56  
57  
58  
59  
60

1  
2  
3 estimates from Wald and Law's article, and applied them to a population with the  
4 characteristics of the Framingham and Framingham offspring study cohort. This population  
5 was classified into three classes according to 10 year coronary heart disease risk using a risk  
6 score (the Anderson equation). Costs were calculated on the basis of unit costs valid for the  
7 healthcare system in the Netherlands. The calculations showed that the pill would be cost-  
8 effective (less than €20,000 per year of life saved) as long as the yearly costs of the pill would  
9 be below approximately €270 in high risk groups and €160 in intermediate risk groups (10% -  
10 20% risk). Indeed, with the yearly costs of the polypill we assumed in our study, which were  
11 far below this threshold, we found all scenarios to be cost effective. This was despite the fact  
12 that the effectiveness estimates we used were much lower than those of Wald and Law's.  
13  
14  
15  
16  
17  
18

19 These lower estimates are due to insights gained since then, as, steps towards realization of  
20 the polypill concept have been taken. Several prototypes have been developed and large scale  
21 clinical trials are currently under way. Yet, the only clinical evidence so far concerns a brief  
22 randomized trial of 12 weeks of treatment, the Polycap study. On the basis of this limited  
23 evidence it was concluded that the pill seems safe and that the effects on blood pressure and  
24 cholesterol are not inferior to the individual substances given separately. However, it must be  
25 said that the effects on these intermediate endpoints fall well below the rough estimates made  
26 by Law and Wald, who calculated that up to 80% of all cardiovascular events in the  
27 population at large could be prevented. There are two main sources for the discrepancy  
28 between their estimates and our calculations. Firstly, both the estimated effects on  
29 intermediate endpoints and the relative risk reductions (per unit of risk factor level reduction)  
30 Law and Wald used seem to have been too optimistic. Secondly, we did not consider the  
31 introduction of the polypill in the "universal" manner envisioned in their original article. It  
32 seems very unlikely that medicalization of a whole population will ever find wide support.  
33 Instead, we imagined a situation in which the polypill would be introduced within the current  
34 context of cardiovascular risk management and primary prevention. This approach is in line  
35 with current views on focusing on those at increased risk and finding ways of identifying  
36 them.<sup>42</sup> Only limited experience exists with this type of primary prevention, which might be  
37 best described as opportunistic screening.<sup>43</sup> Hence, we had to make several assumptions to  
38 estimate the number of individuals who would ultimately take the polypill. These include the  
39 preparedness of GP's to engage in opportunistic screening, the proportion of eligible  
40 individuals who are willing to choose lifelong medication, and their compliance with  
41 treatment. Many will probably prefer changing their lifestyles, or will start but not continue.  
42 A lack of compliance obviously reduces cost-effectiveness, as investments are made that do  
43 not pay out in terms of health gains. On the other hand, the combination of drugs in one pill  
44 takes away an obstacle to compliance in patients requiring more than one drug.<sup>44-46, 47</sup>  
45  
46  
47  
48  
49  
50  
51  
52  
53  
54  
55  
56  
57  
58  
59  
60

Literature shows that adherence to medication declines with the number of drugs prescribed.<sup>44</sup>  
48 49

Especially in primary prevention, the safety and side effects of a drug are of crucial concern. As far as statins are concerned, the most serious complication is rhabdomyolysis, which is very rare, but can be fatal. More frequent are complaints of muscle pain.<sup>50</sup> However, a review and meta-analysis of Weng et al., of 75 trials showed that the incidence of muscle toxicity was low in all trials.<sup>34</sup> The most recent Cochrane meta-analysis did not find significant differences between placebo and treatment groups. The most important consequence would be that the relatively minor side effects would reduce adherence, or lead to discontinuation, an effect that is indirectly included in our model (via reduced compliance). The same applies to the side-effects of the blood pressure lowering components. In particular cough caused by an ACE inhibitor, which is independent of the dose, could lead to discontinuation of the pill.<sup>28</sup> Aspirin can cause gastro-intestinal bleedings and hemorrhagic stroke.<sup>38 51 52</sup> The latter more or less annul the protective effect on ischemic stroke, such that the net effect is neutral. The increased risk of gastrointestinal bleeding, which we took into account, further contributed to the relatively unfavorable profile of a polypill containing aspirin, which turned out to be the least cost-effective option.

To gain more definite insights into the cost-effectiveness of the polypill in the opportunistic screening setting we envisioned, two major “unknowns” need to be clarified. Firstly, the results of large-scale phase III clinical trials will have to show how the effects on intermediate endpoints translate into clinical benefit. In particular, they will need to answer the question whether the “sum is greater than the parts”, both with regards to benefits as to safety. Secondly, more needs to be known about the willingness to participate in opportunistic screening initiatives. This applies to eligible persons, but also to general practitioners. Also the practical consequences and logistic difficulties in implementing opportunistic screening will need to be addressed.

### *Implications*

Primary prevention is increasingly seen as a crucial tool in further reducing the burden of cardiovascular disease. In a health care system such as that of the Netherlands, in which the general practitioner occupies a central role, opportunistic screening is a feasible strategy of which the benefits are currently being actively explored. Thus, in the Netherlands an opportunistic screening by the general practitioners has recently been introduced and reimbursement has been recommended. Obviously, in order to make most out of this opportunity, insights into the relative cost-effectiveness of alternative preventive measures for those at increased risk is essential, as are the implications on effects and costs over a long time. Low doses aspirin are not recommended in the Dutch guideline in the primary

1  
2  
3 prevention of cardiovascular diseases.<sup>18</sup> This is based on the adverse effects like  
4 gastrointestinal bleedings and hemorrhagic stroke caused by aspirin<sup>51 52</sup>. The advantage of  
5 using a polypill without aspirin is that these adverse effects due to aspirin could be avoided.  
6 Since the introduction of the concept of a polypill by Wald and Law there were different  
7 changes in the composition and dosage of the medication put into this pill. One can expect  
8 that in the future further changes in the composition and dosage will lead to a better balanced  
9 pill. For example, ACE antihypertensive drugs cause often an unpleasant tickling cough.  
10 Replacement with a selective type 1 angiotensin II-receptor-(AT<sub>1</sub>-) antagonist could solve this  
11 problem.

12 Guidelines on primary prevention cardiovascular suggest first to start with life-style changes  
13 like increase the physical activity and diet advices. In our calculation we did not include the  
14 costs and the effects of a life-style advisor.

### 21 *Conclusion*

22 The polypill or variants thereof seem to offer an efficient way to reduce the cardiovascular  
23 disease burden. Opportunistic screening of the population of 40 years or above to select  
24 individuals with a mild to moderately increased risk for cardiovascular diseases, followed by  
25 polypill prescription would prevent approximately 3.5% of all cardiovascular events. The  
26 cost-effectiveness of all variants is within the same order of magnitude. Therefore other  
27 aspects will determine which composition of pill is to be preferred, such as side effect profile  
28 and total health gains. Based on these criteria, our study suggests that the polypill without  
29 aspirin and a double statin dose is the most favorable option.  
30  
31  
32  
33  
34  
35  
36  
37  
38

39 **Funding** This research received no specific grant from any funding agency in the public,  
40 commercial or not-for-profit sectors

41 **Contributors** PFVG: study design, data-analyses, writing; EABO: study design, statistics,  
42 data-analyses; HHH: study-design, writing; GADW: study-design, writing; MVDB: writing;  
43  
44  
45  
46  
47  
48  
49  
50  
51  
52  
53  
54  
55  
56  
57  
58  
59  
60  
AJS: writing; PME: study-design, data-analyses, writing. All authors reviewed the manuscript  
and critically analyzed the work.

**Data sharing statement** We invite any reader who is interested in seeing the input data and  
the software code of our model to contact us. We offer full access to both the data used and  
the code. The data is available in the Dryad repository with the unique identifier:

doi:10.5061/dryad.qg54c627

## References

1. Wald NJ, Law MR. A strategy to reduce cardiovascular disease by more than 80%. *Bmj* 2003;326(7404):1419.
2. AHA. Cardiovascular Disease Statistics  
American Heart Association, 2010.
3. CBS. Causes of death 2009, short list: CBS, 2010.
4. Vaartjes I, van Dis I, Visseren FLJ, et al. Chapter 1: Cardiovascular disease in the Netherlands (in Dutch). *Cardiovascular diseases in the Netherlands, 2009*. Den Haag, The Netherlands: Dutch Heartfoundation, 2009.
5. Zhao G, Ford ES, Li C, Mokdad AH. Are United States adults with coronary heart disease meeting physical activity recommendations? *Am J Cardiol* 2008;101(5):557-61.
6. Garner JB. Problems of nonadherence in cardiology and proposals to improve outcomes. *Am J Cardiol* 2010;105(10):1495-501.
7. Bates TR, Connaughton VM, Watts GF. Non-adherence to statin therapy: a major challenge for preventive cardiology. *Expert Opin Pharmacother* 2009;10(18):2973-85.
8. Corrao G, Conti V, Merlino L, et al. Results of a retrospective database analysis of adherence to statin therapy and risk of nonfatal ischemic heart disease in daily clinical practice in Italy. *Clin Ther* 2010;32(2):300-10.
9. Graham I, Atar D, Borch-Johnsen K, et al. European guidelines on cardiovascular disease prevention in clinical practice: executive summary. Fourth Joint Task Force of the European Society of Cardiology and other societies on cardiovascular disease prevention in clinical practice (constituted by representatives of nine societies and by invited experts). *Eur J Cardiovasc Prev Rehabil* 2007;14 Suppl 2:E1-40.
10. Conroy RM, Pyorala K, Fitzgerald AP, et al. Estimation of ten-year risk of fatal cardiovascular disease in Europe: the SCORE project. *Eur Heart J* 2003;24(11):987-1003.
11. Lonn E, Bosch J, Teo KK, et al. The polypill in the prevention of cardiovascular diseases: key concepts, current status, challenges, and future directions. *Circulation* 2010;122(20):2078-88.
12. Yusuf S, Pais P, Afzal R, et al. Effects of a polypill (Polycap) on risk factors in middle-aged individuals without cardiovascular disease (TIPS): a phase II, double-blind, randomised trial. *Lancet* 2009;373(9672):1341-51.
13. Lonn E, Yusuf S, Arnold MJ, et al. Homocysteine lowering with folic acid and B vitamins in vascular disease. *N Engl J Med* 2006;354(15):1567-77.

14. van Dis I, Kromhout D, Geleijnse JM, et al. Evaluation of cardiovascular risk predicted by different SCORE equations: the Netherlands as an example. *Eur J Cardiovasc Prev Rehabil* 2010;17(2):244-9.
15. Hoogenveen RT, van Baal PH, Boshuizen HC. Chronic disease projections in heterogeneous ageing populations: approximating multi-state models of joint distributions by modelling marginal distributions. *Math Med Biol* 2010;27(1):1-19.
16. Jacobs-van der Bruggen MA, Bos G, Bemelmans WJ, et al. Lifestyle interventions are cost-effective in people with different levels of diabetes risk: results from a modeling study. *Diabetes Care* 2007;30(1):128-34.
17. De Backer G, Ambrosioni E, Borch-Johnsen K, et al. European guidelines on cardiovascular disease prevention in clinical practice. Third Joint Task Force of European and Other Societies on Cardiovascular Disease Prevention in Clinical Practice. *Eur Heart J* 2003;24(17):1601-10.
18. CBO. Dutch Guideline Cardiovascular Risk Management  
In: CBO DifHI, editor. Utrecht, The Netherlands, 2006.
19. Baal PHM, Feenstra TL, Hoogenveen RT, et al. Cost-Effectiveness analysis with the RIVM Chronic Disease Model. Bilthoven, Netherlands: Dutch National Institute for Public Health and the Environment, 2005.
20. Slobbe LCJ, Kommer GJ, Smit JM, et al. Cost-of-illness in the Netherlands 2003  
Bilthoven, Netherlands: National Institute for Public Health and the Environment, 2006.
21. Melse JM, Essink-Bot ML, Kramers PG, et al. A national burden of disease calculation: Dutch disability-adjusted life-years. Dutch Burden of Disease Group. *Am J Public Health* 2000;90(8):1241-7.
22. Stouthard MEA, Essink-Bot ML, Bonsel GJ. Disability weights for diseases: A modified protocol and results for a Western European region. *European Journal of Public Health* 2000;10(1):24-30.
23. Lopez AD, Murray CC. The global burden of disease, 1990-2020. *Nat Med* 1998;4(11):1241-3.
24. van Baal PH, Hoeymans N, Hoogenveen RT, et al. Disability weights for comorbidity and their influence on health-adjusted life expectancy. *Popul Health Metr* 2006;4:1.
25. Verschuren WM, Blokstra A, Picavet HS, et al. Cohort profile: the Doetinchem Cohort Study. *Int J Epidemiol* 2008;37(6):1236-41.
26. CBS. Statistics Netherlands: CBS, 2010.
27. Chapman RH, Petrilla AA, Benner JS, et al. Predictors of adherence to concomitant antihypertensive and lipid-lowering medications in older adults: a retrospective, cohort study. *Drugs Aging* 2008;25(10):885-92.

- 1
- 2
- 3 28. Law MR, Wald NJ, Morris JK, Jet al. Value of low dose combination treatment with
- 4 blood pressure lowering drugs: analysis of 354 randomised trials. *Bmj*
- 5 2003;326(7404):1427.
- 6
- 7 29. Turnbull F, Neal B, Ninomiya T, et al. Effects of different regimens to lower blood
- 8 pressure on major cardiovascular events in older and younger adults: meta-analysis of
- 9 randomised trials. *Bmj* 2008;336(7653):1121-3.
- 10
- 11 30. Turnbull F, Neal B, Algert C, et al. Effects of different blood pressure-lowering
- 12 regimens on major cardiovascular events in individuals with and without diabetes
- 13 mellitus: results of prospectively designed overviews of randomized trials. *Arch*
- 14 *Intern Med* 2005;165(12):1410-9.
- 15
- 16 31. Taylor F, Ward K, Moore TH, et al. Statins for the primary prevention of
- 17 cardiovascular disease. *Cochrane Database Syst Rev* 2011(1):CD004816.
- 18
- 19 32. Baigent C, Blackwell L, Emberson J, et al. Efficacy and safety of more intensive
- 20 lowering of LDL cholesterol: a meta-analysis of data from 170,000 participants in 26
- 21 randomised trials. *Lancet* 2010;376(9753):1670-81.
- 22
- 23 33. Baigent C, Keech A, Kearney PM, et al. Efficacy and safety of cholesterol-lowering
- 24 treatment: prospective meta-analysis of data from 90,056 participants in 14
- 25 randomised trials of statins. *Lancet* 2005;366(9493):1267-78.
- 26
- 27 34. Weng TC, Yang YH, Lin SJ, et al. A systematic review and meta-analysis on the
- 28 therapeutic equivalence of statins. *J Clin Pharm Ther* 2010;35(2):139-51.
- 29
- 30 35. Baigent C, Blackwell L, Collins R, et al. Aspirin in the primary and secondary
- 31 prevention of vascular disease: collaborative meta-analysis of individual participant
- 32 data from randomised trials. *Lancet* 2009;373(9678):1849-60.
- 33
- 34 36. Hakkaart-van Roijen L, Tan SS, Bouwmans CAM. Manual for costing research.
- 35 Methods and directive prices for economic evaluation in health care (in Dutch)
- 36 Diemen: Institute for Medical Technology Assessment, Erasmus MC, 2010.
- 37
- 38 37. CVZ. Medicijnkosten. Diemen: CVZ, 2010.
- 39
- 40 38. Berger JS, Roncaglioni MC, Avanzini F, et al. Aspirin for the primary prevention of
- 41 cardiovascular events in women and men: a sex-specific meta-analysis of randomized
- 42 controlled trials. *Jama*, 2006:306-13.
- 43
- 44 39. Pignone M, Earnshaw S, Pletcher MJ, et al. Aspirin for the primary prevention of
- 45 cardiovascular disease in women: a cost-utility analysis. *Arch Intern Med*
- 46 2007;167(3):290-5.
- 47
- 48 40. van den Berg M, de Wit GA, Vijgen SM, et al. [Cost-effectiveness of prevention:
- 49 opportunities for public health policy in the Netherlands]. *Ned Tijdschr Geneesk*
- 50 2008;152(23):1329-34.
- 51
- 52
- 53
- 54
- 55
- 56
- 57
- 58
- 59
- 60



- 1
  - 2
  - 3
  - 4
  - 5
  - 6
  - 7
  - 8
  - 9
  - 10
  - 11
  - 12
  - 13
  - 14
  - 15
  - 16
  - 17
  - 18
  - 19
  - 20
  - 21
  - 22
  - 23
  - 24
  - 25
  - 26
  - 27
  - 28
  - 29
  - 30
  - 31
  - 32
  - 33
  - 34
  - 35
  - 36
  - 37
  - 38
  - 39
  - 40
  - 41
  - 42
  - 43
  - 44
  - 45
  - 46
  - 47
  - 48
  - 49
  - 50
  - 51
  - 52
  - 53
  - 54
  - 55
  - 56
  - 57
  - 58
  - 59
  - 60
41. Franco OH, Steyerberg EW, de Laet C. The polypill: at what price would it become cost effective? *J Epidemiol Community Health* 2006;60(3):213-7.
42. Wald NJ, Simmonds M, Morris JK. Screening for future cardiovascular disease using age alone compared with multiple risk factors and age. *PLoS ONE* 2011;6(5):e18742.
43. van de Kerkhof RM, Godefrooij MB, Wouda PJ, et al. [Cardiometabolic risk factors detected with a preventative screening programme]. *Ned Tijdschr Geneesk* 2010;154:A1860.
44. Saini SD, Schoenfeld P, Kaulback K, et al. Effect of medication dosing frequency on adherence in chronic diseases. *Am J Manag Care* 2009;15(6):e22-33.
45. Pan F, Chernew ME, Fendrick AM. Impact of fixed-dose combination drugs on adherence to prescription medications. *J Gen Intern Med* 2008;23(5):611-4.
46. Gerbino PP, Shoheiber O. Adherence patterns among patients treated with fixed-dose combination versus separate antihypertensive agents. *Am J Health Syst Pharm* 2007;64(12):1279-83.
47. Erdine S. Compliance with the treatment of hypertension: the potential of combination therapy. *J Clin Hypertens (Greenwich)* 2010;12(1):40-6.
48. WHO. Adherence to long-term therapies: evidence for action. Geneva, Switzerland: World Health Organization, 2003.
49. Claxton AJ, Cramer J, Pierce C. A systematic review of the associations between dose regimens and medication compliance. *Clin Ther* 2001;23(8):1296-310.
50. Pasternak RC, Smith SC, Jr., Bairey-Merz CN, et al. ACC/AHA/NHLBI Clinical Advisory on the Use and Safety of Statins. *Circulation* 2002;106(8):1024-8.
51. Sanmuganathan PS, Ghahramani P, Jackson PR, et al. Aspirin for primary prevention of coronary heart disease: safety and absolute benefit related to coronary risk derived from meta-analysis of randomised trials. *Heart* 2001;85(3):265-71.
52. Hayden M, Pignone M, Phillips C, et al. Aspirin for the primary prevention of cardiovascular events: a summary of the evidence for the U.S. Preventive Services Task Force. *Ann Intern Med* 2002;136(2):161-72.

1  
2  
3  
4  
5  
6  
7  
8  
9  
10  
11  
12  
13  
14  
15  
16  
17  
18  
19  
20  
21  
22  
23  
24  
25  
26  
27  
28  
29  
30  
31  
32  
33  
34  
35  
36  
37  
38  
39  
40  
41  
42  
43  
44  
45  
46  
47  
48  
49  
50  
51  
52  
53  
54  
55  
56  
57  
58  
59  
60

**Appendix**

For peer review only

Show

Figure 15.5.a: Drummond checklist (Drummond 1996)

| Item                                                                                                                                            | Yes                                 | No                       | Not clear                | Not appropriate                     |
|-------------------------------------------------------------------------------------------------------------------------------------------------|-------------------------------------|--------------------------|--------------------------|-------------------------------------|
| <b>Study design</b>                                                                                                                             |                                     |                          |                          |                                     |
| 1. The research question is stated.                                                                                                             | <input checked="" type="checkbox"/> | <input type="checkbox"/> | <input type="checkbox"/> |                                     |
| 2. The economic importance of the research question is stated.                                                                                  | <input checked="" type="checkbox"/> | <input type="checkbox"/> | <input type="checkbox"/> |                                     |
| 3. The viewpoint(s) of the analysis are clearly stated and justified.                                                                           | <input checked="" type="checkbox"/> | <input type="checkbox"/> | <input type="checkbox"/> |                                     |
| 4. The rationale for choosing alternative programmes or interventions compared is stated.                                                       | <input checked="" type="checkbox"/> | <input type="checkbox"/> | <input type="checkbox"/> |                                     |
| 5. The alternatives being compared are clearly described.                                                                                       | <input checked="" type="checkbox"/> | <input type="checkbox"/> | <input type="checkbox"/> |                                     |
| 6. The form of economic evaluation used is stated.                                                                                              | <input checked="" type="checkbox"/> | <input type="checkbox"/> | <input type="checkbox"/> |                                     |
| 7. The choice of form of economic evaluation is justified in relation to the questions addressed.                                               | <input checked="" type="checkbox"/> | <input type="checkbox"/> | <input type="checkbox"/> |                                     |
| <b>Data collection</b>                                                                                                                          |                                     |                          |                          |                                     |
| 8. The source(s) of effectiveness estimates used are stated.                                                                                    | <input checked="" type="checkbox"/> | <input type="checkbox"/> | <input type="checkbox"/> |                                     |
| 9. Details of the design and results of effectiveness study are given (if based on a single study).                                             | <input type="checkbox"/>            | <input type="checkbox"/> | <input type="checkbox"/> | <input checked="" type="checkbox"/> |
| 10. Details of the methods of synthesis or meta-analysis of estimates are given (if based on a synthesis of a number of effectiveness studies). | <input checked="" type="checkbox"/> | <input type="checkbox"/> | <input type="checkbox"/> | <input type="checkbox"/>            |
| 11. The primary outcome measure(s) for the economic evaluation are clearly stated.                                                              | <input checked="" type="checkbox"/> | <input type="checkbox"/> | <input type="checkbox"/> |                                     |
| 12. Methods to value benefits are stated.                                                                                                       | <input type="checkbox"/>            | <input type="checkbox"/> | <input type="checkbox"/> | <input checked="" type="checkbox"/> |
| 13. Details of the subjects from whom valuations were obtained were given.                                                                      | <input type="checkbox"/>            | <input type="checkbox"/> | <input type="checkbox"/> | <input checked="" type="checkbox"/> |
| 14. Productivity changes (if included) are reported separately.                                                                                 | <input type="checkbox"/>            | <input type="checkbox"/> | <input type="checkbox"/> | <input checked="" type="checkbox"/> |
| 15. The relevance of productivity changes to the study question is discussed.                                                                   | <input type="checkbox"/>            | <input type="checkbox"/> | <input type="checkbox"/> | <input checked="" type="checkbox"/> |
| 16. Quantities of resource use are reported separately from their unit costs.                                                                   | <input checked="" type="checkbox"/> | <input type="checkbox"/> | <input type="checkbox"/> |                                     |
| 17. Methods for the estimation of quantities and unit costs are described.                                                                      | <input checked="" type="checkbox"/> | <input type="checkbox"/> | <input type="checkbox"/> |                                     |
| 18. Currency and price data are recorded.                                                                                                       | <input checked="" type="checkbox"/> | <input type="checkbox"/> | <input type="checkbox"/> |                                     |
| 19. Details of currency of price adjustments for inflation or currency conversion are given.                                                    | <input type="checkbox"/>            | <input type="checkbox"/> | <input type="checkbox"/> | <input checked="" type="checkbox"/> |
| 20. Details of any model used are given.                                                                                                        | <input checked="" type="checkbox"/> | <input type="checkbox"/> | <input type="checkbox"/> | <input type="checkbox"/>            |
| 21. The choice of model used and the key parameters on which it is based are justified.                                                         | <input checked="" type="checkbox"/> | <input type="checkbox"/> | <input type="checkbox"/> | <input type="checkbox"/>            |
| <b>Analysis and interpretation of results</b>                                                                                                   |                                     |                          |                          |                                     |
| 22. Time horizon of costs and benefits is stated.                                                                                               | <input checked="" type="checkbox"/> | <input type="checkbox"/> | <input type="checkbox"/> | <input type="checkbox"/>            |
| 23. The discount rate(s) is stated.                                                                                                             | <input checked="" type="checkbox"/> | <input type="checkbox"/> | <input type="checkbox"/> | <input type="checkbox"/>            |
| 24. The choice of discount rate(s) is justified.                                                                                                | <input checked="" type="checkbox"/> | <input type="checkbox"/> | <input type="checkbox"/> | <input type="checkbox"/>            |
| 25. An explanation is given if costs and benefits are not discounted.                                                                           | <input type="checkbox"/>            | <input type="checkbox"/> | <input type="checkbox"/> | <input checked="" type="checkbox"/> |
| 26. Details of statistical tests and confidence intervals are given for stochastic data.                                                        | <input checked="" type="checkbox"/> | <input type="checkbox"/> | <input type="checkbox"/> | <input type="checkbox"/>            |
| 27. The approach to sensitivity analysis is given.                                                                                              | <input checked="" type="checkbox"/> | <input type="checkbox"/> | <input type="checkbox"/> | <input type="checkbox"/>            |
| 28. The choice of variables for sensitivity analysis is justified.                                                                              | <input checked="" type="checkbox"/> | <input type="checkbox"/> | <input type="checkbox"/> | <input type="checkbox"/>            |
| 29. The ranges over which the variables are varied are justified.                                                                               | <input checked="" type="checkbox"/> | <input type="checkbox"/> | <input type="checkbox"/> | <input type="checkbox"/>            |
| 30. Relevant alternatives are compared.                                                                                                         | <input checked="" type="checkbox"/> | <input type="checkbox"/> | <input type="checkbox"/> | <input type="checkbox"/>            |
| 31. Incremental analysis is reported.                                                                                                           | <input checked="" type="checkbox"/> | <input type="checkbox"/> | <input type="checkbox"/> | <input type="checkbox"/>            |
| 32. Major outcomes are presented in a disaggregated as well as aggregated form.                                                                 | <input checked="" type="checkbox"/> | <input type="checkbox"/> | <input type="checkbox"/> |                                     |
| 33. The answer to the study question is given.                                                                                                  | <input checked="" type="checkbox"/> | <input type="checkbox"/> | <input type="checkbox"/> |                                     |
| 34. Conclusions follow from the data reported.                                                                                                  | <input checked="" type="checkbox"/> | <input type="checkbox"/> | <input type="checkbox"/> |                                     |
| 35. Conclusions are accompanied by the appropriate caveats.                                                                                     | <input checked="" type="checkbox"/> | <input type="checkbox"/> | <input type="checkbox"/> |                                     |

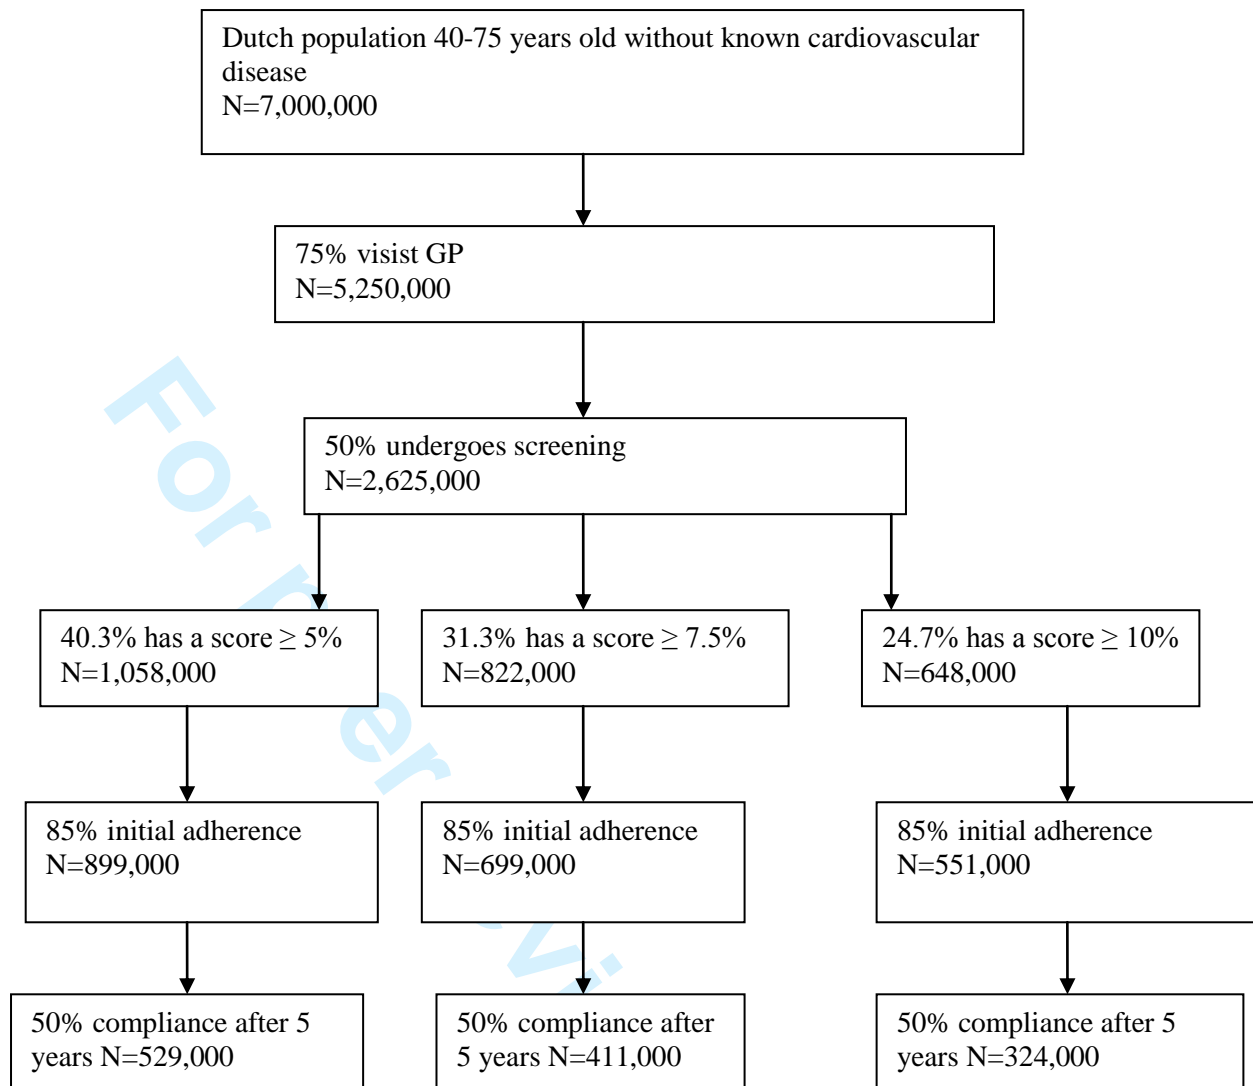

Figure 1. Flow chart of participation

Costs in € \*1,000,000,000

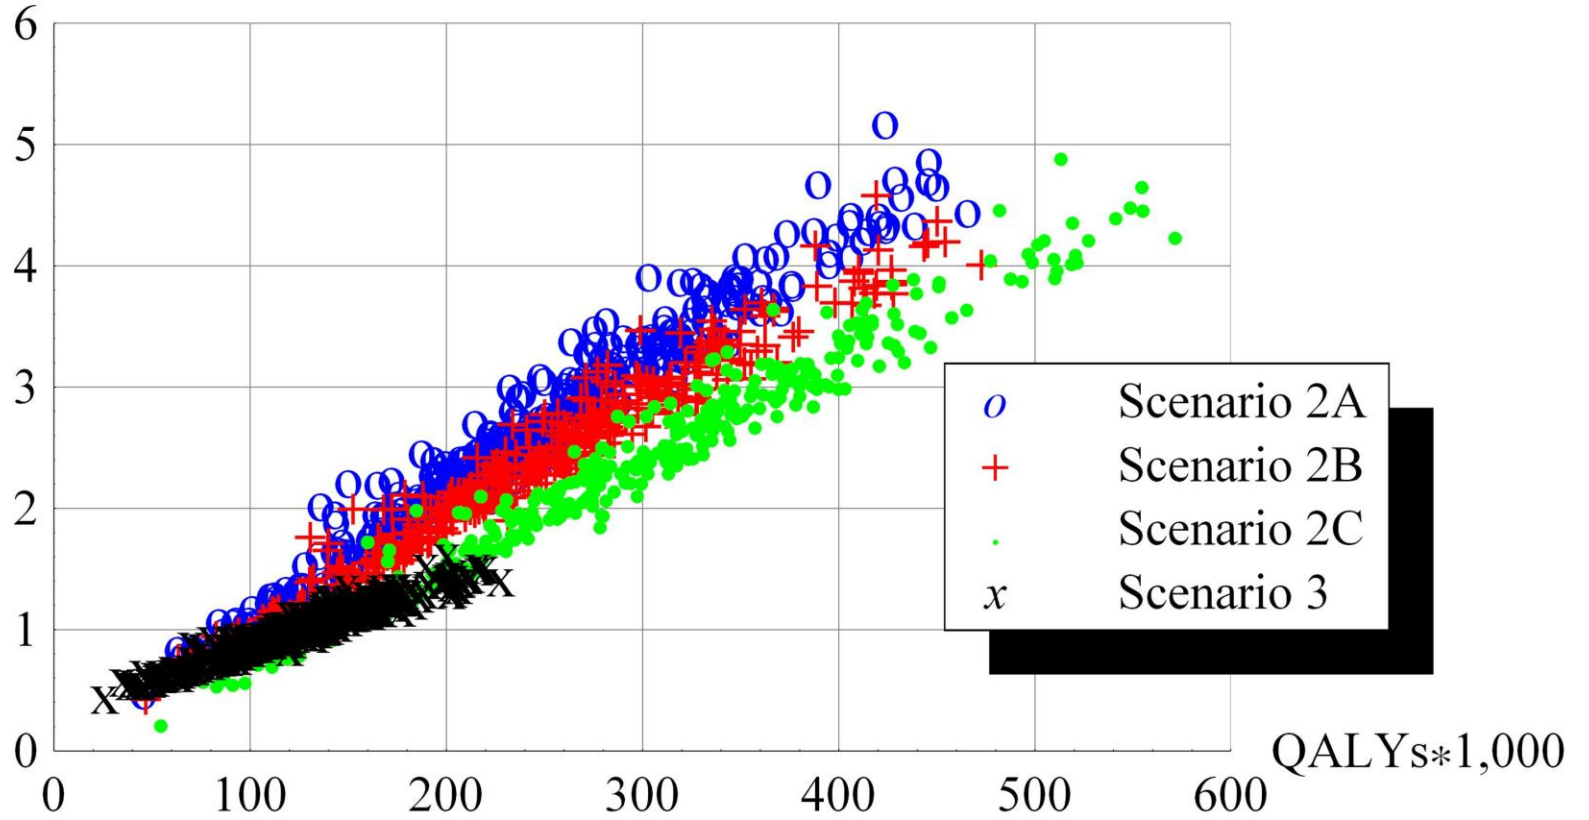

1  
2  
3  
4  
5  
6  
7  
8  
9  
10  
11  
12  
13  
14  
15  
16  
17  
18  
19  
20  
21  
22  
23  
24  
25  
26  
27  
28  
29  
30  
31  
32  
33  
34  
35  
36  
37  
38  
39  
40  
41  
42  
43  
44  
45  
46  
47  
48  
49

1  
2  
3  
4  
5  
6  
7  
8  
9  
10  
11  
12  
13  
14  
15  
16  
17  
18  
19  
20  
21  
22  
23  
24  
25  
26  
27  
28  
29  
30  
31  
32  
33  
34  
35  
36  
37  
38  
39  
40  
41  
42  
43  
44  
45  
46  
47  
48  
49

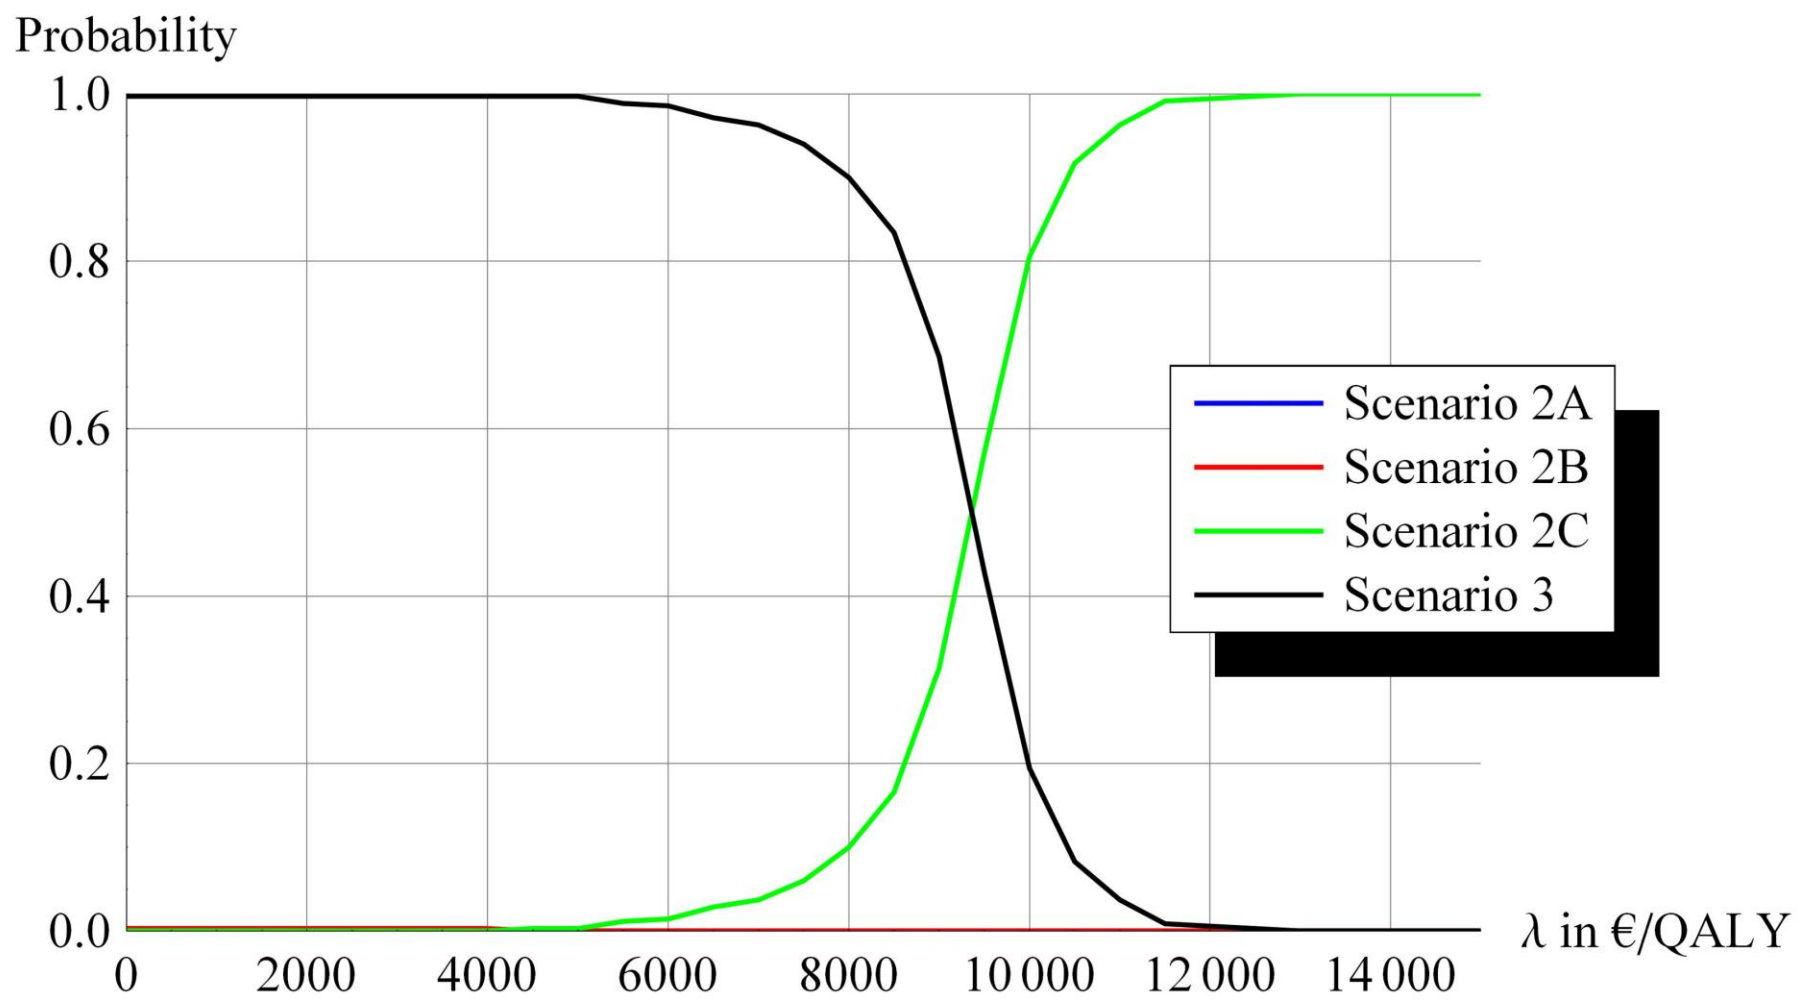

Supplement: bmjopen-2011-000363.draft_revisions.pdf [file bmjopen-2011-000363.draft_revisions.pdf]
