# Supplementary material for: The polypill in the primary prevention of cardiovascular disease: cost-effectiveness in the Dutch population
Source: PubMed Central journal article supplement — BMJ Open. 2011 Dec 21;1(2):e000363. doi: 10.1136/bmjopen-2011-000363 (PMC3278482; doi:10.1136/bmjopen-2011-000363), 2011-12-21
Supplement: bmjopen-2011-000363-s1.pdf [file bmjopen-2011-000363-s1.pdf]

Show

Figure 15.5.a: Drummond checklist (Drummond 1996)

| Item                                                                                                                                            | Yes                                 | No                       | Not clear                | Not appropriate                     |
|-------------------------------------------------------------------------------------------------------------------------------------------------|-------------------------------------|--------------------------|--------------------------|-------------------------------------|
| <b>Study design</b>                                                                                                                             |                                     |                          |                          |                                     |
| 1. The research question is stated.                                                                                                             | <input checked="" type="checkbox"/> | <input type="checkbox"/> | <input type="checkbox"/> |                                     |
| 2. The economic importance of the research question is stated.                                                                                  | <input checked="" type="checkbox"/> | <input type="checkbox"/> | <input type="checkbox"/> |                                     |
| 3. The viewpoint(s) of the analysis are clearly stated and justified.                                                                           | <input checked="" type="checkbox"/> | <input type="checkbox"/> | <input type="checkbox"/> |                                     |
| 4. The rationale for choosing alternative programmes or interventions compared is stated.                                                       | <input checked="" type="checkbox"/> | <input type="checkbox"/> | <input type="checkbox"/> |                                     |
| 5. The alternatives being compared are clearly described.                                                                                       | <input checked="" type="checkbox"/> | <input type="checkbox"/> | <input type="checkbox"/> |                                     |
| 6. The form of economic evaluation used is stated.                                                                                              | <input checked="" type="checkbox"/> | <input type="checkbox"/> | <input type="checkbox"/> |                                     |
| 7. The choice of form of economic evaluation is justified in relation to the questions addressed.                                               | <input checked="" type="checkbox"/> | <input type="checkbox"/> | <input type="checkbox"/> |                                     |
| <b>Data collection</b>                                                                                                                          |                                     |                          |                          |                                     |
| 8. The source(s) of effectiveness estimates used are stated.                                                                                    | <input checked="" type="checkbox"/> | <input type="checkbox"/> | <input type="checkbox"/> |                                     |
| 9. Details of the design and results of effectiveness study are given (if based on a single study).                                             | <input type="checkbox"/>            | <input type="checkbox"/> | <input type="checkbox"/> | <input checked="" type="checkbox"/> |
| 10. Details of the methods of synthesis or meta-analysis of estimates are given (if based on a synthesis of a number of effectiveness studies). | <input checked="" type="checkbox"/> | <input type="checkbox"/> | <input type="checkbox"/> | <input type="checkbox"/>            |
| 11. The primary outcome measure(s) for the economic evaluation are clearly stated.                                                              | <input checked="" type="checkbox"/> | <input type="checkbox"/> | <input type="checkbox"/> |                                     |
| 12. Methods to value benefits are stated.                                                                                                       | <input type="checkbox"/>            | <input type="checkbox"/> | <input type="checkbox"/> | <input checked="" type="checkbox"/> |
| 13. Details of the subjects from whom valuations were obtained were given.                                                                      | <input type="checkbox"/>            | <input type="checkbox"/> | <input type="checkbox"/> | <input checked="" type="checkbox"/> |
| 14. Productivity changes (if included) are reported separately.                                                                                 | <input type="checkbox"/>            | <input type="checkbox"/> | <input type="checkbox"/> | <input checked="" type="checkbox"/> |
| 15. The relevance of productivity changes to the study question is discussed.                                                                   | <input type="checkbox"/>            | <input type="checkbox"/> | <input type="checkbox"/> | <input checked="" type="checkbox"/> |
| 16. Quantities of resource use are reported separately from their unit costs.                                                                   | <input checked="" type="checkbox"/> | <input type="checkbox"/> | <input type="checkbox"/> |                                     |
| 17. Methods for the estimation of quantities and unit costs are described.                                                                      | <input checked="" type="checkbox"/> | <input type="checkbox"/> | <input type="checkbox"/> |                                     |
| 18. Currency and price data are recorded.                                                                                                       | <input checked="" type="checkbox"/> | <input type="checkbox"/> | <input type="checkbox"/> |                                     |
| 19. Details of currency of price adjustments for inflation or currency conversion are given.                                                    | <input type="checkbox"/>            | <input type="checkbox"/> | <input type="checkbox"/> | <input checked="" type="checkbox"/> |
| 20. Details of any model used are given.                                                                                                        | <input checked="" type="checkbox"/> | <input type="checkbox"/> | <input type="checkbox"/> | <input type="checkbox"/>            |
| 21. The choice of model used and the key parameters on which it is based are justified.                                                         | <input checked="" type="checkbox"/> | <input type="checkbox"/> | <input type="checkbox"/> | <input type="checkbox"/>            |
| <b>Analysis and interpretation of results</b>                                                                                                   |                                     |                          |                          |                                     |
| 22. Time horizon of costs and benefits is stated.                                                                                               | <input checked="" type="checkbox"/> | <input type="checkbox"/> | <input type="checkbox"/> | <input type="checkbox"/>            |
| 23. The discount rate(s) is stated.                                                                                                             | <input checked="" type="checkbox"/> | <input type="checkbox"/> | <input type="checkbox"/> | <input type="checkbox"/>            |
| 24. The choice of discount rate(s) is justified.                                                                                                | <input checked="" type="checkbox"/> | <input type="checkbox"/> | <input type="checkbox"/> | <input type="checkbox"/>            |
| 25. An explanation is given if costs and benefits are not discounted.                                                                           | <input type="checkbox"/>            | <input type="checkbox"/> | <input type="checkbox"/> | <input checked="" type="checkbox"/> |
| 26. Details of statistical tests and confidence intervals are given for stochastic data.                                                        | <input checked="" type="checkbox"/> | <input type="checkbox"/> | <input type="checkbox"/> | <input type="checkbox"/>            |
| 27. The approach to sensitivity analysis is given.                                                                                              | <input checked="" type="checkbox"/> | <input type="checkbox"/> | <input type="checkbox"/> | <input type="checkbox"/>            |
| 28. The choice of variables for sensitivity analysis is justified.                                                                              | <input checked="" type="checkbox"/> | <input type="checkbox"/> | <input type="checkbox"/> | <input type="checkbox"/>            |
| 29. The ranges over which the variables are varied are justified.                                                                               | <input checked="" type="checkbox"/> | <input type="checkbox"/> | <input type="checkbox"/> | <input type="checkbox"/>            |
| 30. Relevant alternatives are compared.                                                                                                         | <input checked="" type="checkbox"/> | <input type="checkbox"/> | <input type="checkbox"/> | <input type="checkbox"/>            |
| 31. Incremental analysis is reported.                                                                                                           | <input checked="" type="checkbox"/> | <input type="checkbox"/> | <input type="checkbox"/> | <input type="checkbox"/>            |
| 32. Major outcomes are presented in a disaggregated as well as aggregated form.                                                                 | <input checked="" type="checkbox"/> | <input type="checkbox"/> | <input type="checkbox"/> |                                     |
| 33. The answer to the study question is given.                                                                                                  | <input checked="" type="checkbox"/> | <input type="checkbox"/> | <input type="checkbox"/> |                                     |
| 34. Conclusions follow from the data reported.                                                                                                  | <input checked="" type="checkbox"/> | <input type="checkbox"/> | <input type="checkbox"/> |                                     |
| 35. Conclusions are accompanied by the appropriate caveats.                                                                                     | <input checked="" type="checkbox"/> | <input type="checkbox"/> | <input type="checkbox"/> |                                     |
